1 **Retinal energy metabolism: Photoreceptors switch between Cori, Cahill, and mini-Krebs**  
2 **cycles to uncouple glycolysis from mitochondrial respiration**

3

4 Yiyi Chen<sup>1, 6</sup>, Laimdota Zizmare<sup>2, 6</sup>, Victor Calbiague<sup>3</sup>, Shirley Yu<sup>1</sup>, Friedrich W. Herberg<sup>4</sup>, Oliver  
5 Schmachtenberg<sup>3</sup>, François Paquet-Durand<sup>1, 6, 7\*</sup>, Christoph Trautwein<sup>2, 6</sup>

6 <sup>1</sup> Institute for Ophthalmic Research, University of Tübingen, 72076, Germany

7 <sup>2</sup> Werner Siemens Imaging Center, Department of Preclinical Imaging and Radiopharmacy, University  
8 of Tübingen, 72076, Germany

9 <sup>3</sup> Centro Interdisciplinario de Neurociencia de Valparaíso, Universidad de Valparaíso, Chile

10 <sup>4</sup> Biochemistry Department, University of Kassel, 34132, Germany

11 <sup>6</sup> These authors contributed equally

12 <sup>7</sup> Lead contact

13 \*Corresponding author: [francois.paquet-durand@klinikum.uni-tuebingen.de](mailto:francois.paquet-durand@klinikum.uni-tuebingen.de)

14

15 **Summary**

16 The retina consumes massive amounts of energy, yet its metabolism remains poorly understood. Here,  
17 we manipulated retinal energy metabolism under entirely controlled conditions and utilised <sup>1</sup>H-NMR  
18 metabolomics, *in situ* enzyme detection, and cell viability readouts to uncover the pathways of retinal  
19 energy production. Our experiments resulted in varying degrees of photoreceptor degeneration, while  
20 the inner retina and retinal pigment epithelium were essentially unaffected. Notably, rod  
21 photoreceptors relied strongly on oxidative phosphorylation, but only mildly on glycolysis. Conversely,  
22 cone photoreceptors were highly dependent on glycolysis but insensitive to electron transport chain  
23 decoupling. Moreover, photoreceptors uncouple glycolytic and Krebs-cycle metabolism via three  
24 different pathways: 1) the mini-Krebs cycle, fuelled by glutamine and branched chain amino acids,  
25 generating N-acetylaspartate; 2) the alanine-generating Cahill cycle; 3) the lactate-releasing Cori cycle.  
26 These findings forward the understanding of retinal physiology and pathology, and shed new light on  
27 neuronal energy homeostasis and the pathogenesis of neurodegenerative diseases.

28

29 **Keywords**

30 Energy homeostasis, tricarboxylic acid cycle, astrocyte-neuron lactate shuttle, glucose transport, N-  
31 acetylaspartate, anaplerotic substrates, aerobic glycolysis, glucose-alanine cycle, alanine transaminase,  
32 aspartate amino transferase

33

34 **Abbreviations**

35 1,9-DDF – 1,9 dideoxyforskolin, AA – amino acids, AAT – aspartate amino transferase, ADP – adenosine  
36 diphosphate, ALT – alanine transaminase, ATP – adenosine triphosphate, BCAA – branched chain  
37 amino acid, COX – cytochrome oxidase, GAC – glutaminase C, GCs – ganglion cells, GLUT - glucose  
38 transporter, GS – glutamine synthase, GTP – guanosine triphosphate, GABA – gamma amino butyric  
39 acid, GPC – sn-glycero-3-phosphate, FCCP – carbonyl cyanide-*p*-trifluoromethoxyphenylhydrazone,  
40 GSSG – glutathione disulfide, INL – inner nuclear layer, MGC – Müller glial cells, NAA – N-  
41 acetylaspartate, NAD<sup>+</sup> – nicotinamide adenine dinucleotide, ONL – outer nuclear layer, O-PE – O-  
42 phosphoethanolamine, OXPHOS – oxidative phosphorylation, PARP – poly(ADP)ribose polymerase,  
43 PCK – pyruvate carboxy kinase, PKM – pyruvate kinase M, PNA - peanut agglutinin, RP – retinitis  
44 pigmentosa, RPE – retinal pigment epithelium, RPE65 – retinal pigment epithelium-specific 65 kDa  
45 protein, SUCLG1 – succinate-CoA ligase-1, TUNEL – terminal UDP nick-end labelling, UDP – uracil  
46 diphosphate

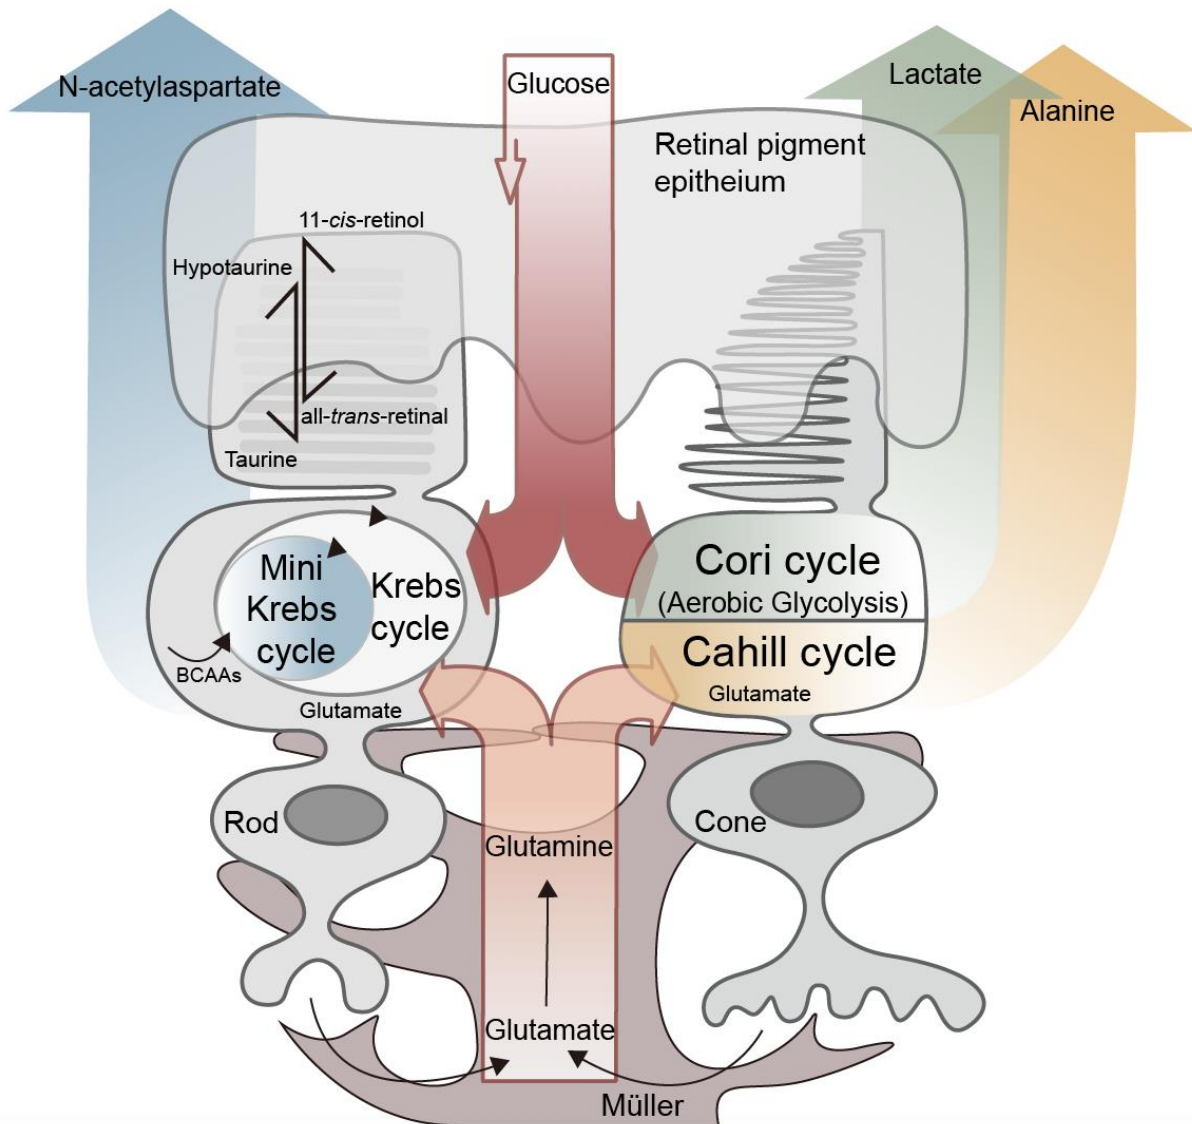

47

48 **Graphical abstract:** Retinal photoreceptors employ both glucose and anaplerotic substrates  
49 as fuels. While rod photoreceptors rely strongly on oxidative phosphorylation and the N-  
50 acetylaspartate producing mini Krebs-cycle, cone photoreceptors rely much more on the  
51 lactate-producing Cori-cycle and the oxidative, alanine-producing Cahill-cycle.

52

## 53 **Introduction**

54 The retina is the neuronal tissue with the highest energy demand<sup>1,2</sup>. Paradoxically, the mammalian  
55 retina has been suggested to strongly rely on energy-inefficient glycolysis, even though oxygen and  
56 high energy yield oxidative phosphorylation (OXPHOS) would be available<sup>3</sup>. This aerobic glycolysis  
57 releases large amounts of lactate, as already reported in the 1920s by Otto Warburg<sup>4</sup>. High retinal  
58 energy demand is linked to the extraordinary single-photon sensitivity of photoreceptors<sup>2,5,6</sup>, as well  
59 as to lipid synthesis for the constant renewal of photoreceptor outer segments<sup>7,8</sup>.

60 The retina harbours two types of photoreceptors: rods, which exhibit remarkable light sensitivity and  
61 enable night vision; and cones, which work in daylight and allow colour vision. Cones spend around  
62 twice as much energy as rods<sup>9</sup>. Photoreceptors are not connected to the vasculature and are nourished  
63 by other retinal cell types, including retinal pigment epithelial (RPE) cells or Müller glial cells (MGC).  
64 Moreover, photoreceptors can experience changes in energy demand on a millisecond timescale, from  
65 very high in the dark, to much lower in light.

66 Glycolysis provides for rapid but inefficient ATP production, while Krebs cycle and OXPHOS are very  
67 efficient but much slower. Since glycolysis and Krebs cycle are metabolically coupled through pyruvate,  
68 it is unclear how photoreceptors adapt to sudden and large changes in energy demand. Also, what  
69 energy substrates and shuttles are used by photoreceptors, is a matter of debate<sup>10,11</sup>. A recent  
70 hypothesis proposed that photoreceptors use predominantly aerobic glycolysis, with the resultant  
71 lactate utilized by the RPE and MGCs for OXPHOS<sup>10,12</sup>. However, this is in contrast with the high density  
72 of mitochondria in photoreceptor inner segments. Retinal energy metabolism has obvious  
73 ramifications for the pathogenesis of diseases, including diabetic retinopathy, age-related macular  
74 degeneration, or inherited retinal diseases, such as retinitis pigmentosa.

75 Here, we studied expression of energy metabolism-related enzymes in different retinal cell types, using  
76 organotypic retinal explants maintained in serum-free, fully defined medium. Metabolic functions of  
77 the RPE were investigated by culturing retina with and without RPE. As readouts, we correlated

78 enzyme expression with proton nuclear magnetic resonance ( $^1\text{H-NMR}$ ) spectroscopy-based  
79 metabolomics and cell death. Notably, interventions in energy metabolism caused selective  
80 photoreceptor cell death, while leaving other retinal cell types unaffected. Metabolomic analysis and  
81 localization of key enzymes identified novel pathways and shuttles, explaining the strong  
82 interdependence of the various retinal cell types, and opening new perspectives for the treatment of  
83 neurodegenerative diseases in the retina and beyond.

84

## 85 **Results**

### 86 **Retinal expression patterns of key energy metabolism related enzymes**

87 We used immunofluorescence to assess expression and cellular localization of enzymes important for  
88 retinal metabolism (Figure 1). The outermost retinal layer is formed by RPE cells expressing RPE-  
89 specific 65 kDa protein (RPE65), dedicated to the recycling of photopigment retinal<sup>13</sup>. Hence,  
90 immunolabeling for RPE65 revealed the RPE cell monolayer (Figure 1A). Immunofluorescence for  
91 glucose-transporter-1 (GLUT1) showed a strong labelling on both basal and apical sides of RPE cells  
92 (Figure 1A), in line with previous literature<sup>14-16</sup>. Glucose uptake from the RPE into the neuroretina is  
93 mediated by high affinity/high capacity GLUT3<sup>17</sup> strongly expressed on photoreceptor inner segments  
94 (Supplementary Figure 1). Pyruvate kinase is essential to glycolysis, catalyzing the conversion of  
95 phosphoenolpyruvate to pyruvate. While pyruvate kinase M1 (PKM1) was expressed in the inner retina  
96 (Supplementary Figure 1), PKM2 was located to the outer nuclear layer (ONL), in photoreceptor inner  
97 segments and synapses (Figure 1A). Expression of mitochondrial cytochrome oxidase (COX) largely  
98 overlapped with PKM2 (Figure 1A).

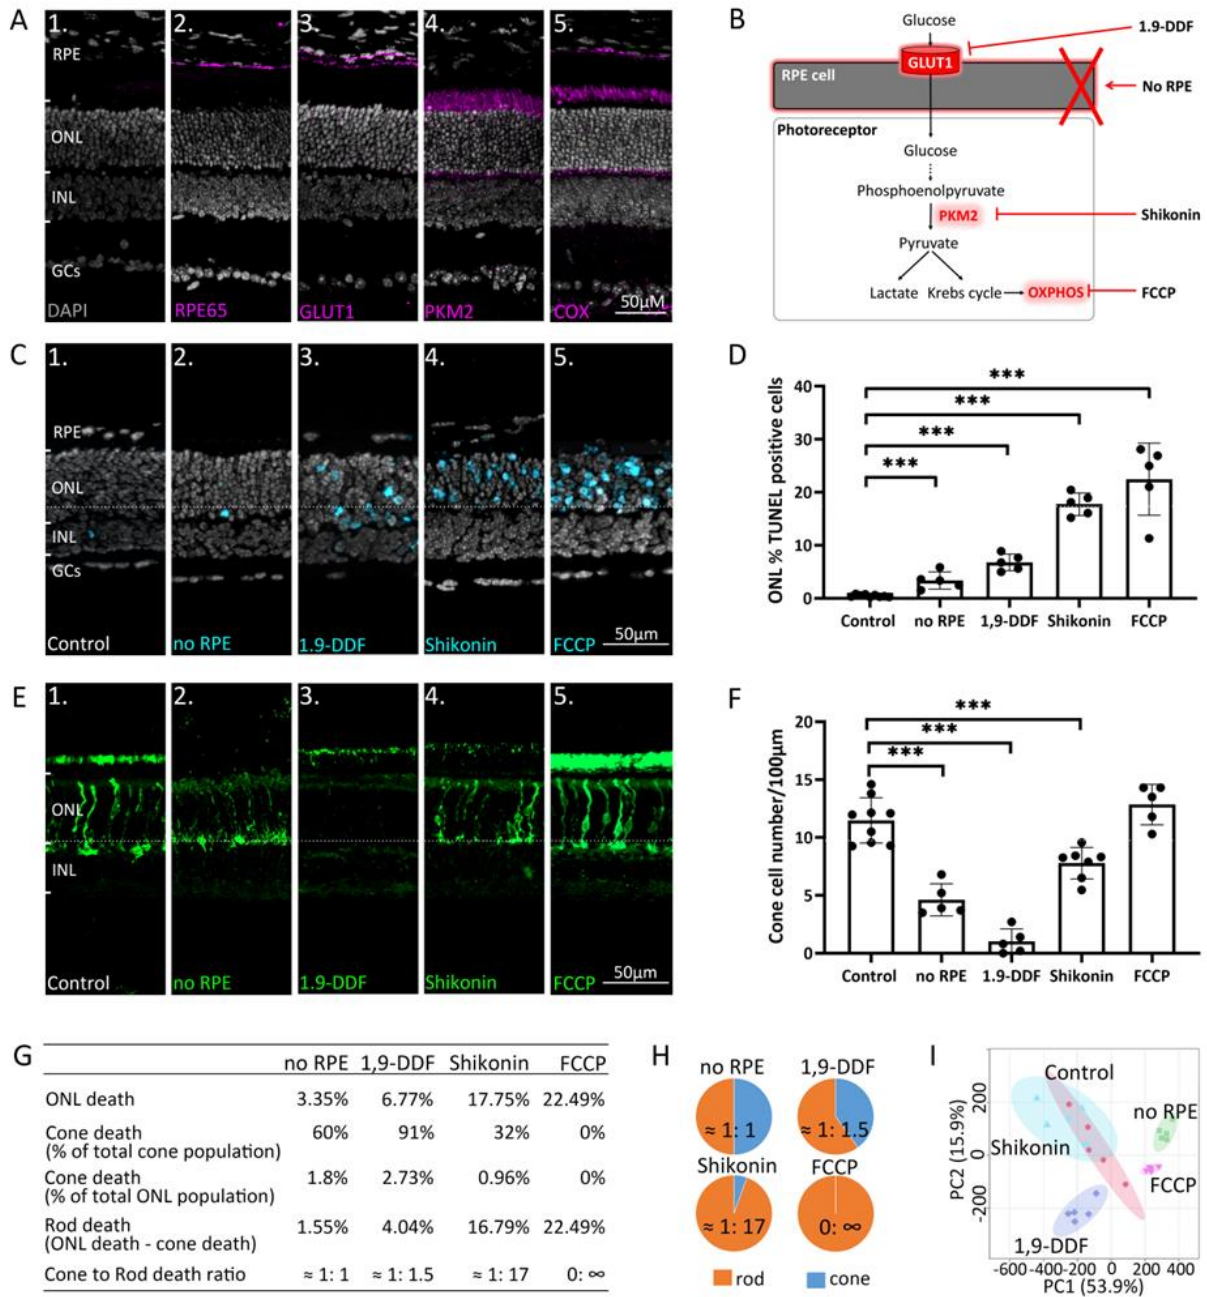

99

100 **Figure 1. Manipulating energy metabolism differentially affects rod and cone photoreceptors.**  
 101 (A) Immunofluorescence staining (magenta): (A1) negative control, (A2) RPE65, (A3) glucose  
 102 transporter-1 (GLUT1), (A4) pyruvate kinase M2 (PKM2), (A5) mitochondrial cytochrome oxidase (COX).  
 103 (B) Overview of experimental manipulations. Organotypic retinal explants were cultured with or  
 104 without RPE or treated with 1,9-DDF, Shikonin, or FCCP. (C) TUNEL assay (cyan) marking dying cells in  
 105 the five experimental conditions. (D) Quantification of TUNEL-positive cells in outer nuclear layer  
 106 (ONL). Data represented as mean ± SD. (E) Cone-arrestin labelling (green) in the ONL. (F) Quantification  
 107 of arrestin-positive cones. Data represented as mean ± SD. (G) Table giving percentages of cones and  
 108 rods lost for each treatment. (H) Pie charts illustrate cone to rod cell death ratios. (I) Principal  
 109 component analysis (PCA) of retinal samples investigated with <sup>1</sup>H NMR spectroscopy-based  
 110 metabolomics. Dots in graphs represent individual retinal explants. Asterisks indicate significance  
 111 levels: \*p<0.05, \*\*p<0.01, \*\*\* p<0.001. RPE = Retinal pigment epithelium; INL = inner nuclear layer;  
 112 GCs = ganglion cells.

### 113 **Challenging energy metabolism reduces rod and cone photoreceptor viability**

114 To dissect retinal energy metabolism, we selectively manipulated key pathways (Figure 1B) using  
115 organotypic retinal explants<sup>18</sup>. Retinal cultures were prepared with the RPE cell layer attached to the  
116 neuroretina (**control**) or without RPE (**no RPE**). In **control**, the rate of ONL cell death, as assessed by  
117 the TUNEL assay (Figure 1C, D), was low ( $0.46\% \pm 0.22$ ,  $n=9$ ). The **noRPE** condition displayed significantly  
118 increased photoreceptor cell death ( $3.35\% \pm 1.62$ ,  $n=5$ ,  $p < 0.001$ ). Blocking RPE glucose transport with  
119 the selective GLUT1 inhibitor 1,9 dideoxyforskolin (**1,9-DDF**)<sup>19</sup> further increased ONL cell death  
120 ( $6.77\% \pm 1.57$ ,  $n=5$ ,  $p < 0.0001$ ). The inhibition of glycolytic PKM2 with **Shikonin**<sup>20,21</sup>, and OXPHOS  
121 disruption with the electron chain uncoupler carbonyl cyanide-*p*-trifluoromethoxyphenylhydrazone  
122 (**FCCP**)<sup>22</sup> both caused a significant increase in photoreceptor cell death (**Shikonin**:  $17.75\% \pm 2.13$ ,  $n=5$ ,  
123  $p < 0.0001$ ; **FCCP**:  $22.49\% \pm 6.79$ ,  $n=5$ ,  $p < 0.0001$ ). All four experimental interventions mostly affected  
124 photoreceptors, not significantly reducing the viability of other retinal cell types (Figure 1C).

125 Remarkably, a differential effect on cone photoreceptor survival (Figure 1E, F) was observed as  
126 assessed by immunodetection of the cone-specific marker arrestin-3 (Arr3). **Control** retina harboured  
127  $11.47 (\pm 1.95)$ ,  $n=9$  cones per 100  $\mu\text{m}$  of retinal circumference. **noRPE** retina displayed a significant  
128 decrease in cone survival ( $4.62 \pm 1.39$ ,  $n=5$ ,  $p < 0.0001$ ), while blocking RPE glucose transport with **1,9-**  
129 **DDF** led to an even more dramatic reduction ( $1.02 \pm 1.09$ ,  $n=5$ ,  $p < 0.0001$ ). By comparison, inhibition of  
130 glycolysis with **Shikonin** had a relatively mild effect on cone survival ( $7.78 \pm 1.36$ ,  $n=5$ ,  $p < 0.0001$ ).  
131 Surprisingly, **FCCP** treatment did not cause cone death ( $12.84 \pm 1.75$ ,  $n=5$ ,  $p=0.22$ ), compared to **control**.

132 We further calculated the percentages of dying cones and rods, assuming that 3% of all photoreceptors  
133 were cones<sup>23,24</sup> (Figure 1G, H). In the four treatment situations the ratios of cone to rod death were:  
134 **no RPE** = 1:1; **1,9-DDF** = 1:1.5; **Shikonin** = 1:17; and **FCCP** = 0:  $\infty$ . Cones were almost entirely depleted  
135 by the **1,9-DDF** treatment but remained virtually unaffected by the **FCCP** treatment. Rods, however,  
136 were strongly and highly selectively affected by **Shikonin** and **FCCP**, while the **no RPE** condition had a

137 relatively minor effect. These results highlight important differences between rod and cone energy  
138 metabolism.

139

## 140 **Experimental retinal interventions produce characteristic metabolomic patterns**

141 We employed high-field (600 MHz) <sup>1</sup>H-NMR spectroscopy-based metabolomics to study the metabolic  
142 signatures in five experimental groups. A principal component analysis (PCA) showed clear group  
143 separation (Figure 1I). Unbiased clustering of metabolite profiles revealed specific groups that were  
144 differentiated among the five experimental situations (Figure 2A). The greatest cluster overlap was  
145 seen in **control** and **Shikonin** groups. Significant clustering was observed in several amino acid sub-  
146 classes and energy metabolites. We found the strongest changes in the **1,9-DDF** condition, where  
147 glutamate, aspartate, alanine, O-phosphocholine, and nicotinamide adenine dinucleotide (NAD<sup>+</sup>)  
148 concentrations were particularly upregulated compared to control. Further, branched-chain amino  
149 acids (BCAAs), lactate, and threonine were upregulated in the **FCCP** and **no RPE** condition. Glutathione  
150 (GSH) and glutathione disulfide (GSSG) were relatively reduced by **Shikonin**, which increased creatine  
151 and formate. **Control** and **1,9-DDF** treatment displayed high levels of guanosine triphosphate (GTP),  
152 adenosine triphosphate (ATP), and  $\pi$ -methylhistidine, which were low in the other groups (Figure 2A).

153 We then compared metabolite patterns for each treatment to **control** (Figure 2B). Metabolites were  
154 grouped according to class and function, including fundamental metabolic pathways, such as energy  
155 and cofactor metabolism, coenzymes, Krebs cycle, neuronal tissue-associated metabolites and  
156 neurotransmitters, BCAAs, glucogenic and ketogenic amino acids (AAs), serine synthesis pathway, cell  
157 membrane synthesis (Kennedy pathway), and individual features from redox metabolism. Afterwards,  
158 the metabolomic differences identified were explored in detail and related to the retinal expression of  
159 corresponding enzymes.



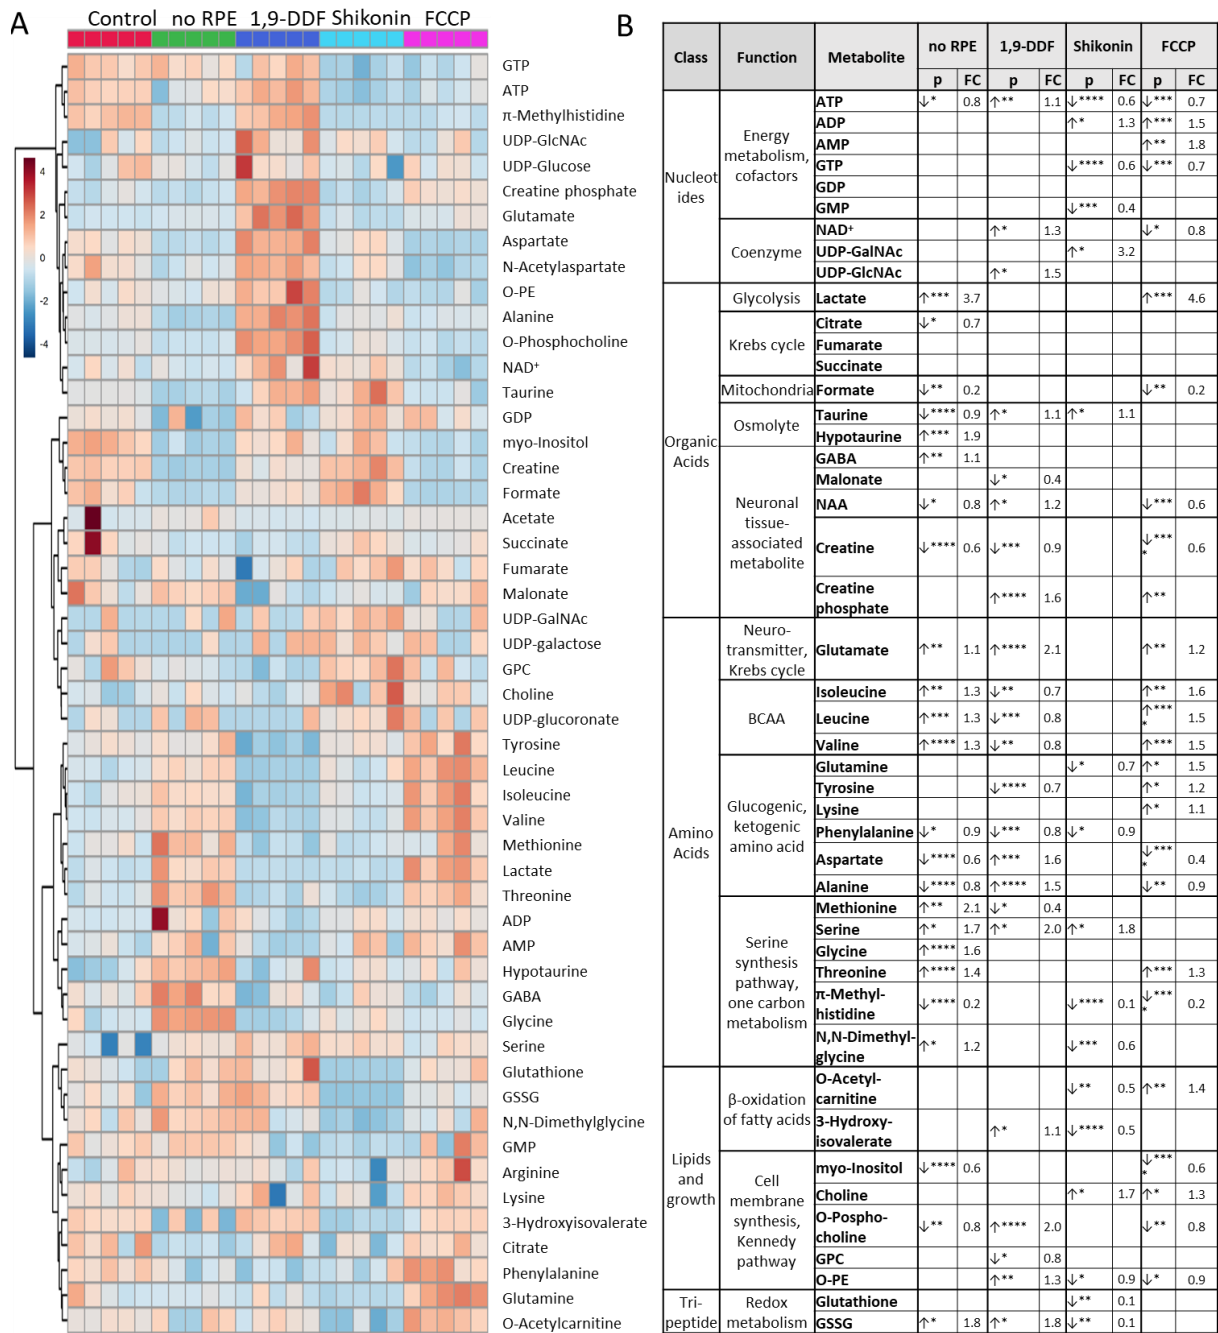

160  
 161 **Figure 2. <sup>1</sup>H-NMR spectroscopy-based metabolomic analysis of retina subjected to interventions in**  
 162 **energy metabolism. (A)** Heatmap (red – high, blue – low), based on unsupervised hierarchical cluster  
 163 analysis by Ward’s linkage, showing metabolite concentrations in five different experimental  
 164 conditions: control - red, no RPE - green, 1,9-DDF - dark blue, Shikonin - light blue, FCCP purple (n = 5  
 165 samples per condition). **(B)** Metabolic profiles of each intervention were compared to control.  
 166 Metabolites significantly changed in at least one experimental condition, were grouped to  
 167 functions and pathways. Data show p-values and fold change (FC) over control. Statistical comparison:  
 168 student’s unpaired t-test (group variance equal); p values: \*\*\*\* < 0.0001, \*\*\* < 0.001, \*\* < 0.01 \* <  
 169 0.05. See also Supplementary Figure 2.

## 170 **Retina cultured without RPE displays strongly increased glycolytic activity**

171 The RPE is tightly bound to the choroid and serves as interface between vasculature and neuroretina.

172 Because of the strong adherence of RPE to the choroid, most prior studies on explanted retina were

173 performed without RPE<sup>3,4,10</sup>. To understand the metabolic communication between neuroretina and

174 RPE, we prepared organotypic retinal explants both with RPE (**control**) or without RPE (**no RPE**).

175 The metabolite profile of **control** was markedly different from retina cultured without RPE, with 25

176 metabolites exhibiting significant changes (Figure 3A, Supplementary Figure 3). Decreased ATP levels

177 in the **no RPE** group, corresponded to increased lactate. The BCAAs isoleucine, leucine, and valine, and

178 some of the glucogenic/ketogenic AAs threonine, methionine, glycine, displayed higher levels in the

179 **no RPE** group compared to control. Alanine, aspartate, and taurine showed the opposite trend.

180 Hypotaurine, 4-aminobutyrate (GABA), and glutamate displayed strong retinal accumulation, while

181 membrane synthesis associated metabolites, such as myo-inositol and O-phosphocholine, as well as

182 creatine and N-acetylaspartate (NAA) were reduced in neuroretina. Moreover, higher levels of GSSG

183 appeared in the absence of RPE, pointing towards an altered redox metabolism.

184 Pattern hunter correlation analysis found citrate, a central Krebs cycle metabolite, positively correlated

185 with taurine, alanine, aspartate, and ATP (Figure 3B). Negative correlations to citrate included ADP,

186 BCAAs, and lactate. A subsequent KEGG-based pathway analysis revealed changes in arginine and

187 proline metabolism, taurine and hypotaurine metabolism, and alanine, aspartate, and glutamate

188 metabolism in the **no RPE** situation (Figure 3C).

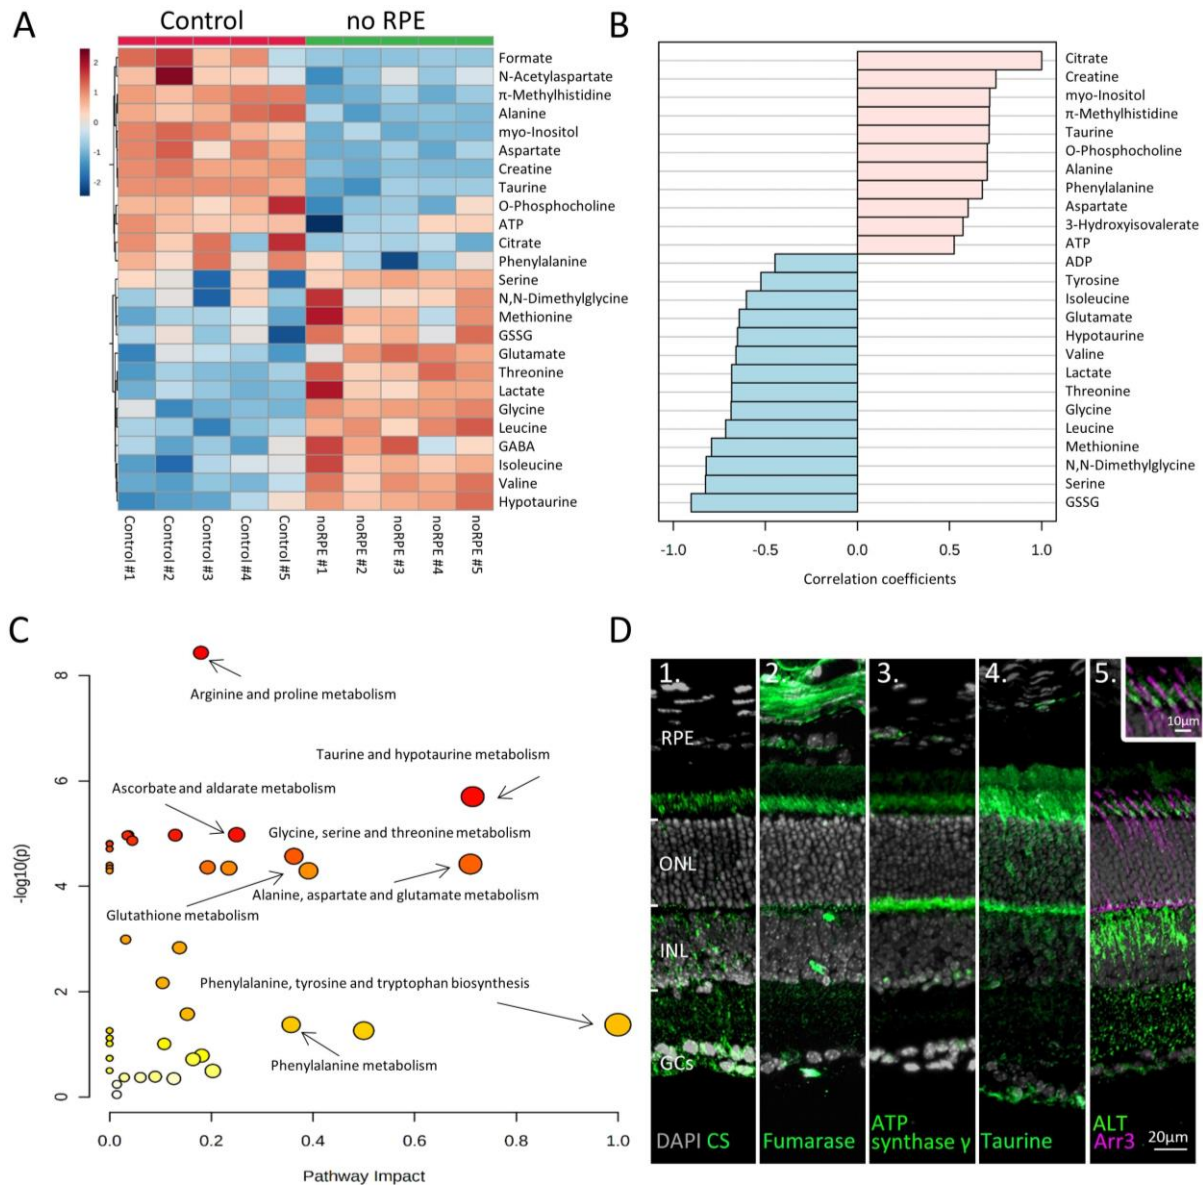

189

190 **Figure 3: Absence of RPE dramatically changes retinal metabolism.** (A) Heatmap, based on  
 191 unsupervised hierarchical cluster analysis by Ward's linkage, illustrating statistically significant changes  
 192 for 25 metabolites (unpaired t-test, fold change (FC) > 1.2, raw *p* value < 0.05). (B) Pattern hunter for  
 193 citrate, showing the top 25 correlating metabolites, correlation coefficient given as Pearson *r* distance.  
 194 (C) Most affected metabolic pathways by *no RPE* condition compared to control, based on KEGG-  
 195 pathway database. (D) Immunodetection of enzymes and metabolites (green): (D1) citrate synthase  
 196 (CS), (D2) fumarase, (D3), ATP synthase  $\gamma$ , (D4) taurine, (D5) alanine transaminase (ALT). Co-staining  
 197 for ALT and cone arrestin (Arr3; magenta) showed high expression in cone inner segments. DAPI (grey)  
 198 was used as a nuclear counterstain. See also Supplementary Figure 3.

199

200 Immunofluorescence was used to localize enzymes likely responsible for the observed metabolic  
 201 changes (Figure 3D). Citrate synthase (CS), the key enzyme of the Krebs cycle, was found mostly in  
 202 photoreceptor inner segments and synaptic terminals. The  $\gamma$ -subunit of ATP synthase, essential for  
 203 OXPHOS, was also localized to photoreceptor inner segments and synapses. Thus, low ATP levels in the

204 **no RPE** group likely resulted from decreased photoreceptor Krebs cycle and OXPHOS activity. High  
205 levels of taurine were detected in photoreceptor inner segments and synapses, as well as in the  
206 ganglion cell layer (Figure 3D). Finally, the enzyme alanine transaminase (ALT), previously thought to  
207 be expressed only in muscle and liver, was found to be expressed in the inner nuclear and plexiform  
208 layers (Figure 3D). ALT was also strongly expressed in cone inner segments, as evidenced by co-  
209 labelling with cone arrestin-3 (Arr3). This expression pattern and high alanine levels in the **control**  
210 suggested Cahill cycle activity in the retina<sup>25</sup>.

211 The patterns observed in the **no RPE to control** comparison indicated that retinal metabolism strongly  
212 depends on RPE-to-neuroretina interactions, including shuttling of metabolites such as  
213 hypotaurine/taurine. Notably, the accumulation of BCAA, glutamate, and lactate, concomitant with  
214 decreased alanine levels in the **no RPE** group, implied that RPE removal switched retinal metabolism  
215 from Krebs cycle/OXPHOS to aerobic glycolysis.

216

### 217 **Photoreceptors use the Krebs cycle to produce GTP**

218 We further compared metabolite patterns between **no RPE** and **FCCP** groups. In Figure 2, the **no RPE**  
219 and **FCCP** groups showed similar metabolite patterns and pathway changes overall. However, a  
220 detailed statistical analysis revealed 17 significant metabolite changes (Figure 4A; Supplementary  
221 Figure 4). Among the most highly downregulated metabolites in the FCCP group was GTP, which  
222 positively correlated with GABA, ATP, GSSG, hypotaurine, and NAD<sup>+</sup> (Figure 4B). In contrast, GDP,  
223 BCAAs, glutamine, and citrate negatively correlated to GTP. The KEGG-based pathway analysis ranked  
224 glycine, serine and threonine metabolism, glutathione metabolism, and alanine, aspartate and  
225 glutamate metabolism as the most significantly changed between the two conditions (Figure 4C).

226 The depletion of GTP in the **FCCP** but not in the **no RPE** situation raised an important question:  
227 Measurable amounts of GTP can only be generated in two ways: 1) by succinate-CoA ligase, GTP-  
228 forming-1 (SUCLG-1) in the Krebs cycle, and 2) by nucleoside-diphosphate kinase (NDK) from excess

229 ATP. Since ATP levels were low in both experimental groups, GTP could not have been produced from  
230 ATP. Immunofluorescence for SUCLG-1 showed strong expression in photoreceptor inner segments  
231 and synapses, where it co-localized to a large extent with mitochondrial COX (Figure 4D). Hence, the  
232 SUCLG-1 retinal expression pattern and the synthesis of GTP in the absence of RPE provided further  
233 evidence for Krebs cycle activity in photoreceptors.

234 We also identified an **FCCP**-induced upregulation of citrate, concomitant with a downregulation of  
235 NAD<sup>+</sup>. This indicated a Krebs cycle interruption at the level of D-isocitrate to  $\alpha$ -ketoglutarate  
236 conversion, *i.e.*, a step that requires NAD<sup>+</sup>. NAD<sup>+</sup> is known to be consumed by poly-ADP-ribose-  
237 polymerase (PARP), which is activated by oxidative DNA damage<sup>26</sup> and up-regulated in dying  
238 photoreceptors<sup>27</sup>. Therefore, we quantified poly-ADP-ribose (PAR) accumulation in retinal cells as a  
239 marker for PARP activity. Compared to the **no RPE** group, more photoreceptor cells in the **FCCP**-treated  
240 retina showed PAR accumulation, correlating with decreased retinal NAD<sup>+</sup> levels (Figure 4E, F). Hence,  
241 **FCCP**-induced oxidative stress may cause increased PARP activity and decreased NAD<sup>+</sup> levels,  
242 eventually interrupting the Krebs cycle, as evidenced by citrate accumulation.

243

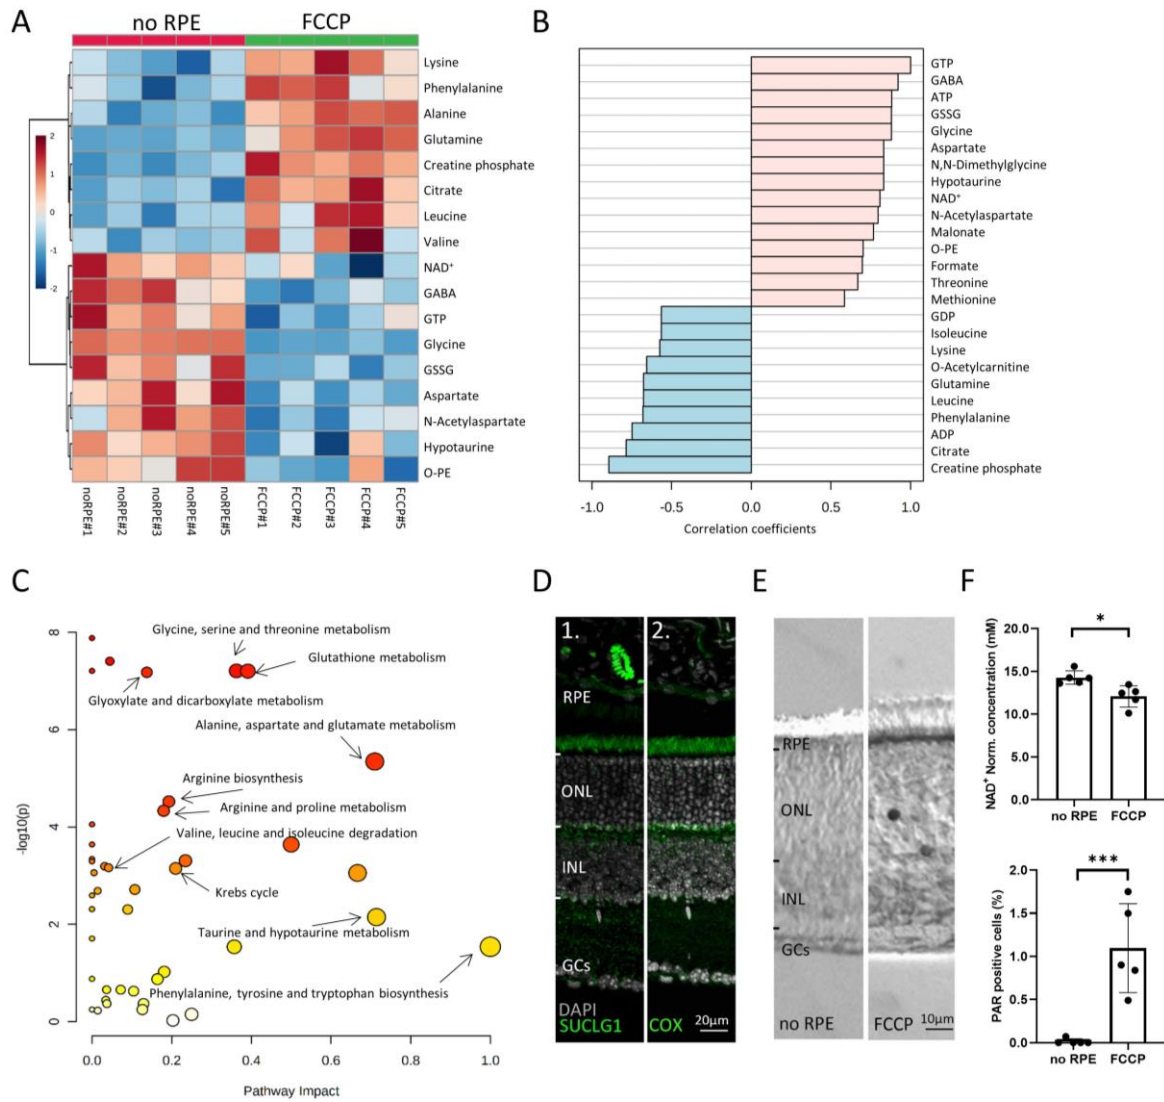

244

245 **Figure 4. Comparison between *no RPE* and *FCCP* conditions.** (A) Heatmap, based on unsupervised  
 246 hierarchical cluster analysis by Ward's linkage, illustrating statistically significant metabolite changes  
 247 (unpaired t-test, fold change > 1.2, raw p-value < 0.05). (B) Pattern hunter for guanosine triphosphate  
 248 (GTP) showing the top 25 correlating compounds. Correlation coefficient given as Pearson r distance.  
 249 (C) KEGG-based pathway analysis, comparison between no RPE and FCCP. (D) Immunofluorescence for  
 250 succinate-CoA ligase-1 (SUCLG1, green) labelled photoreceptor inner segments and colocalized with  
 251 COX. DAPI (grey) was used as a nuclear counterstain. (E) PAR positive photoreceptors (black) in the  
 252 outer nuclear layer (ONL) of FCCP treated retina. (F) Compared to no RPE, NAD<sup>+</sup> levels were lower in  
 253 the FCCP group, while the percentage of PAR positive cells was higher. Data represented as mean  $\pm$  SD.  
 254 *p* values: \*\*\* < 0.001, \* < 0.05. See also Supplementary Figure 4.

255

256 Overall, the data from the *no RPE* to *FCCP* group comparison showed that disruption of OXPHOS led  
 257 to AA accumulation, including lysine, phenylalanine, glutamine, leucine, and valine. Notably, alanine  
 258 accumulation in the *FCCP* group was likely caused by ALT-dependent pyruvate transamination. By  
 259 contrast, metabolites high in the *no RPE* group but low with *FCCP* treatment were probably generated  
 260 via the Krebs cycle in the neuroretina. This concerned especially GTP, aspartate, and NAA.

261 **Reduced retinal glucose uptake promotes anaplerotic metabolism**

262 Since GLUT1 was predominantly expressed in the RPE, we assumed that the metabolic response to **1,9-**  
263 **DDF** treatment might resemble that of the **no RPE** situation. However, the patterns found between  
264 these two groups were very different (*cf.* Figure 2) revealing 28 significantly changed metabolites  
265 (Figure 5A; Supplementary Figure 5). When compared to the **no RPE**, the **1,9-DDF** group showed  
266 changes in mitochondria and Krebs cycle associated metabolites (*e.g.*, high ATP, high formate, low  
267 BCAA). Conversely, the Cahill cycle product alanine and NAA were upregulated by **1,9-DDF** treatment.  
268 The pattern hunter analysis showed that metabolites formate, glutamate, taurine, and citrate were  
269 positively correlated with ATP, while, AMP, GMP, and BCAA were negatively correlated with ATP  
270 (Figure 5B).

271 The KEGG pathway analysis showed alanine, aspartate, and glutamate metabolism, glutathione  
272 metabolism and glycine, serine, and threonine metabolism among the three most affected pathways  
273 (Supplementary Figure 5B). Taken together, the depletion of BCAAs in the **1,9-DDF** treatment indicated  
274 that the retina used anaplerotic substrates to fuel the Krebs cycle and maintain ATP production.

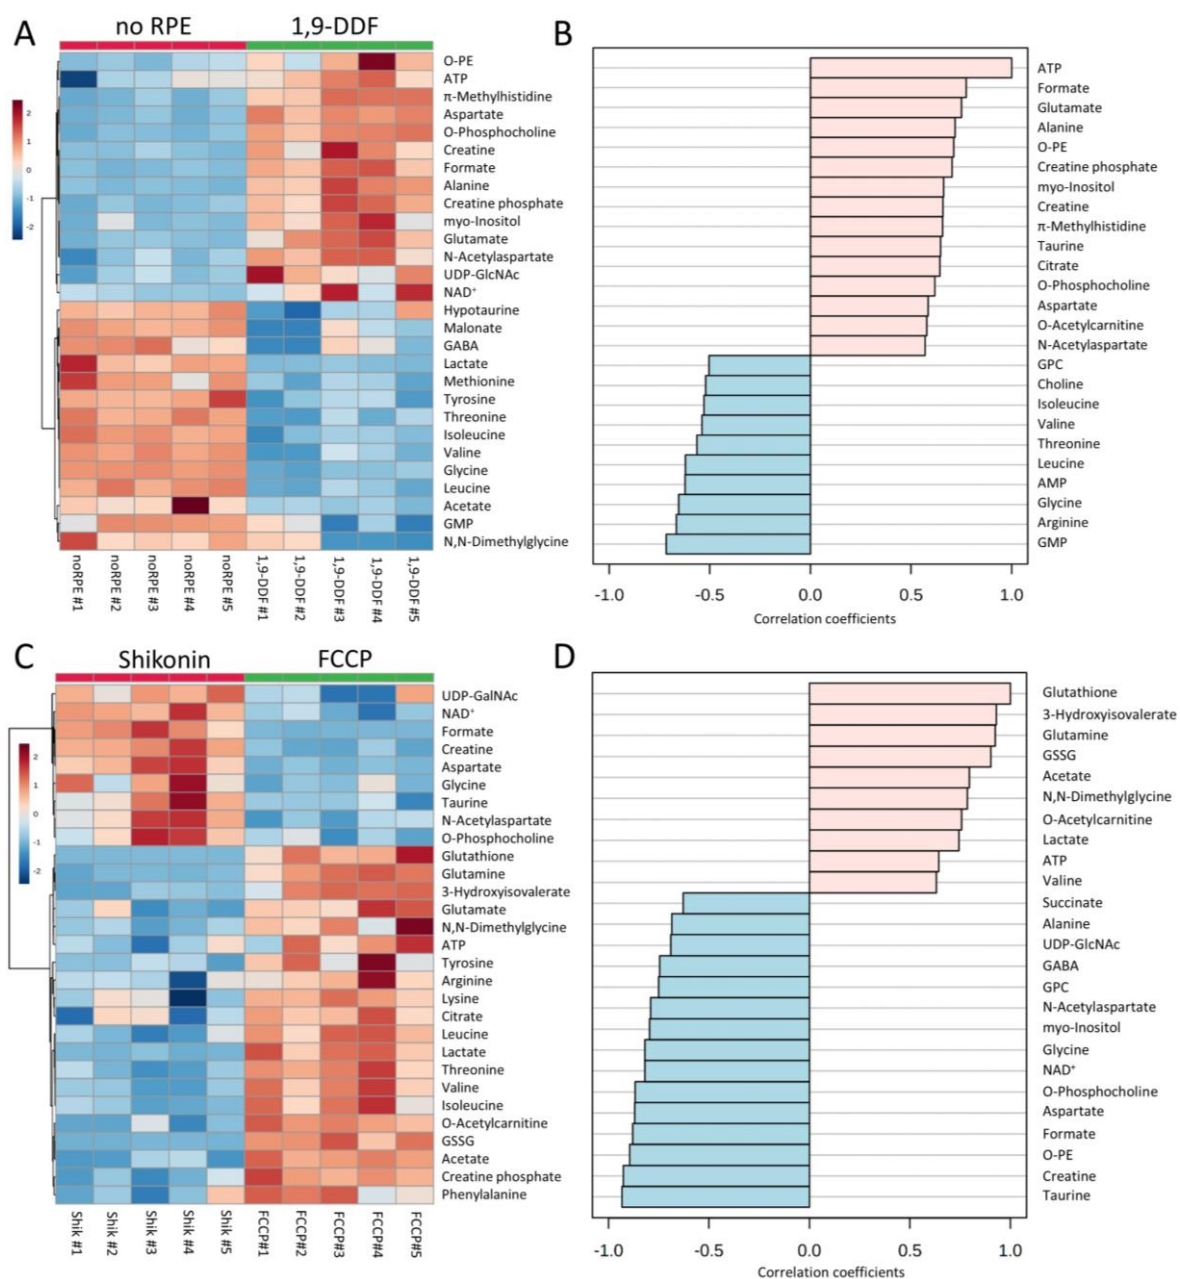

275  
 276 **Figure 5. Metabolomic analysis of no RPE vs. 1,9-DDF treatment and Shikonin vs. FCCP treatment.**  
 277 Heatmap illustrating statistically significant metabolite changes (unpaired t-test, fold change (FC) > 1.2,  
 278 raw  $p$  value < 0.05) for (A) no RPE vs. 1,9-DDF and (C) Shikonin vs. FCCP. Pattern hunter for (B) ATP and  
 279 (D) glutathione, showing the top 25 correlating compounds. Correlation coefficient given as Pearson  $r$   
 280 distance. See also Supplementary Figures 5 and 6.

281

## 282 Inhibition of glycolysis strongly impacts retinal ATP production

283 We compared the *Shikonin* treatment, which inhibits the last step of glycolysis, to the *FCCP* treatment,  
 284 which abolishes mitochondrial ATP synthesis (Figure 5C). Formate, aspartate, and NAA were increased  
 285 in the *Shikonin* group. Conversely, higher amounts of GSH, GSSG, BCAA, threonine, and phenylalanine



286 after **FCCP** treatment indicated Krebs cycle interruption (Supplementary Figure 6). The production of  
287 lactate was higher with **FCCP**- compared to **Shikonin** treatment, reflecting increased glycolysis to  
288 compensate for the loss of Krebs cycle-dependent ATP production. Metabolites connected to oxidative  
289 stress, such as GSSG and GSH, were also increased by **FCCP** treatment. Pattern hunter for metabolites  
290 correlated with glutathione found 3-hydroxyisovalerate, glutamine, GSSG, but also lactate and ATP,  
291 while succinate, alanine, and GABA were negatively correlated with GSH (Figure 5D). The subsequent  
292 pathway analysis identified arginine biosynthesis, alanine, aspartate, and glutamate metabolism, as  
293 well as glycolysis and gluconeogenesis as the most strongly regulated metabolic pathways  
294 (Supplementary Figure 6B).

295

### 296 **Blocking glucose uptake and OXPHOS uncoupling reveal distinct rod and cone metabolism**

297 The metabolic rate of cones is at least two times higher than that of rods<sup>9</sup>. The treatment with **1,9-DDF**  
298 resulted in near complete cone loss, while cones were fully preserved with **FCCP** treatment (*cf.* Figure  
299 1). Therefore, we compared these two experimental groups with **control** to investigate the relative  
300 contributions of rods and cones to the metabolite patterns observed.

301 In this three-way comparison, 29 metabolite concentrations were significantly changed (Figure 6A;  
302 Supplementary Figure 7). The **FCCP** treatment reduced ATP and GTP levels, while lactate production  
303 was strongly increased, along with methionine and threonine. BCAAs, glutamine, phenylalanine and  
304 tyrosine also showed a significant upregulation with **FCCP** treatment. Interestingly, some metabolites  
305 like GSSG, serine, glutamate, alanine, NAD<sup>+</sup>, and taurine displayed a pronounced increase in the **1,9-**  
306 **DDF** group when compared to either **control** or **FCCP**. In addition, formate, aspartate, and myo-inositol  
307 were upregulated with **1,9-DDF** treatment, together with NAA and creatine. Finally, the comparison  
308 between the **1,9-DDF** and **FCCP** groups revealed highly increased levels of ATP and GTP, implying a  
309 strong activation of the Krebs cycle under **1,9-DDF** treatment.

310 A cell type-specific attribution of these metabolite patterns may be superseded by direct drug  
311 treatment effects. Using only metabolite changes in opposing directions from *control* to interpret  
312 different cellular compositions, we identified BCAAs, tyrosine, NAA, and ATP (glutamine with  
313 borderline significance;  $p = 0.66$ ) (Supplementary Figure 7). BCAAs and tyrosine (and glutamine)  
314 exhibited low levels in the rod-rich *1,9-DDF* group and high levels in the cone-rich *FCCP* group,  
315 indicating that these metabolites might be consumed by rods or produced in cones. Vice versa, it can  
316 be assumed that aspartate and NAA were predominantly produced in rods.

317 To investigate the role of glutamine in retinal metabolism, we used immunofluorescence (Figure 6B).  
318 We confirmed a strong expression of glutamine synthase (GS) in MGCs<sup>28</sup>. Remarkably, the enzyme that  
319 hydrolyses glutamine to glutamate, glutaminase C (GAC) was prominently expressed in photoreceptor  
320 inner segments, photoreceptor synapses, and INL. Co-labelling with cone arrestin-3 (Arr3) revealed a  
321 particularly strong expression of GAC in cone inner segments, implying that cones use glutamine  
322 imported from MGCs as metabolic substrate.

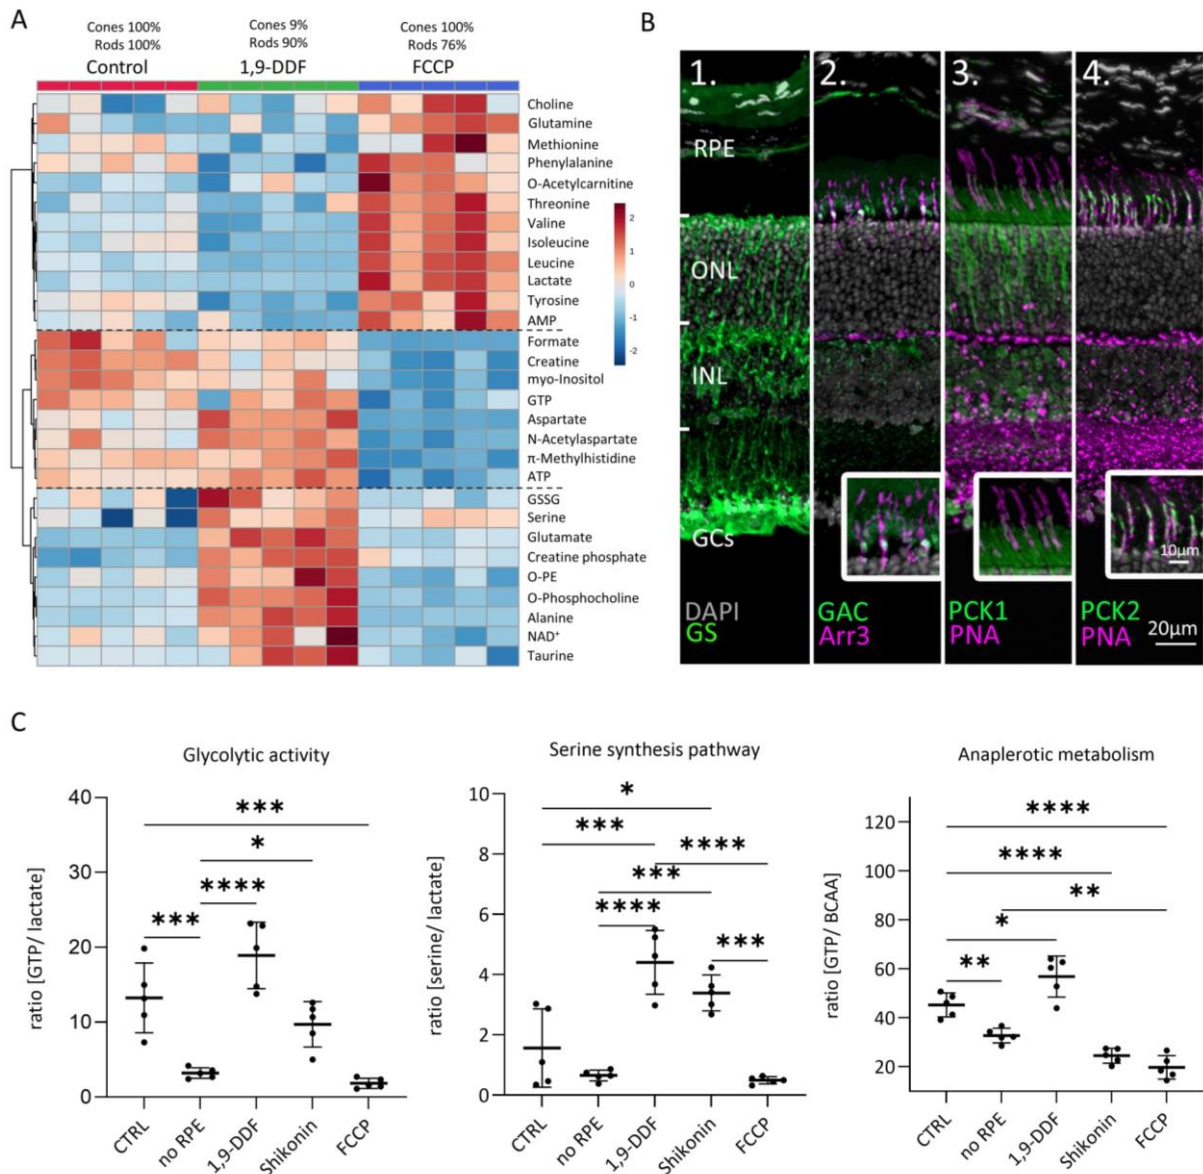

323

324 **Figure 6. Metabolomic comparison between control, 1,9-DDF, and FCCP treatment.** (A) Heatmap  
 325 illustrating 29 statistically significant metabolite changes (parametric one-way ANOVA, Fisher's LSD  
 326 post-hoc analysis). Three main clusters of metabolite changes were evident (dashed lines). (B)  
 327 Immunostaining (green) for enzymes related to glutamine metabolism. DAPI (grey) was used as nuclear  
 328 counterstain. (B1) Glutamine synthase (GS), (B2) glutaminase C (GAC); co-localization with cone-  
 329 arrestin (Arr3; magenta). (B3) phosphoenolpyruvate carboxykinase 1 (PCK1) and (B4) PCK2, both co-  
 330 localized with cone marker peanut-agglutinin (PNA). (C) Ratios between metabolites representing  
 331 glycolysis (lactate vs. GTP), anaplerotic metabolism (GTP vs. BCAA), and serine synthesis pathway  
 332 (serine vs. lactate). Data represented as individual data points with mean  $\pm$  SD. Statistical comparison  
 333 using one-way ANOVA, Tukey's multiple comparisons test;  $p$  values: \*\*\*\*  $< 0.0001$ , \*\*\*  $< 0.001$ , \*\*  $<$   
 334  $0.01$  \*  $< 0.05$ . See also Supplementary Figure 7.

### 335 **Impact on glycolytic activity, serine synthesis pathway, and anaplerotic metabolism**

336 To assess how the various experimental interventions affected retinal metabolism, we calculated the  
337 ratios for pathway specific metabolites (Figure 6C). GTP, when produced by SUCLG-1, is a marker for  
338 Krebs cycle activity, while lactate indicates glycolytic activity. In the **no RPE** group, the GTP-to-lactate  
339 ratio was significantly lower than in **control**, indicating 4.1-times higher glycolytic activity. While in the  
340 **1,9-DDF** and **Shikonin** group the GTP-to-lactate ratios were not significantly different from **control**,  
341 with **FCCP** treatment this ratio dropped to the lowest level, in line with a strong downregulation of  
342 Krebs cycle and concomitant upregulation of glycolysis.

343 We then calculated the ratio of serine to lactate as an indicator for serine synthesis pathway activity.  
344 Under **control** conditions, and in the **no RPE** and **FCCP** groups, this activity was rather low, while it was  
345 strongly increased by **1,9-DDF** and **Shikonin** treatment. In the **Shikonin** group, serine production from  
346 3-phosphoglycerate and subsequent deamination to pyruvate may bypass the PKM2 block. Serine is  
347 also a precursor of phosphatidylserine, one of the three main cell membrane components. Together  
348 with a reduction of choline and high concentrations of myo-inositol, O-phosphocholine, and O-  
349 phosphoethanolamine, this may reflect high cell membrane synthesis under **1,9-DDF** treatment.

350 Finally, we used the ratio of GTP to BCAAs to investigate to what extent Krebs cycle activity was driven  
351 by anaplerotic metabolism. A comparatively low GTP to BCAA ratio in the **no RPE** situation showed  
352 that much of the GTP generated in the neuroretina likely came from anaplerotic substrates. While both  
353 **Shikonin** and **FCCP** treatment decreased BCAA use, **1,9-DDF** treatment increased anaplerotic  
354 metabolism.

## 355 **Evidence for mini-Krebs cycle activity**

356 Comparing the ratios of GTP to lactate with GTP to BCAA in the **no RPE** situation showed that a large  
357 proportion of the GTP produced in the neuroretina by SUCLG-1 was derived from anaplerotic  
358 substrates rather than from pyruvate. These substrates enter the Krebs cycle mostly at the level of  $\alpha$ -  
359 ketoglutarate, suggesting that the neuroretinal Krebs cycle might not start with citrate. Instead, only  
360 the five steps from  $\alpha$ -ketoglutarate to oxaloacetate would be employed, including the GTP-  
361 synthesizing step from succinyl-CoA to succinate (Figure 7A). A key step of this mini-Krebs cycle<sup>29</sup> is the  
362 transamination of oxaloacetate with glutamate by aspartate aminotransferase (AAT) to give  $\alpha$ -  
363 ketoglutarate and aspartate, which is further acetylated to NAA. To investigate this possibility, we  
364 analysed eight metabolites associated with Krebs (citrate, succinate, fumarate, GTP) and mini-Krebs  
365 cycles (glutamine, glutamate, aspartate, NAA).

366 Hierarchical clustering showed similar patterns for aspartate and NAA in all experimental conditions  
367 (Figure 7B). Except for the **FCCP** treatment, the ratio of citrate/NAA was 0.5, indicating that the retina  
368 preferred the mini-Krebs cycle over the full Krebs cycle (Figure 7C). Immunolabelling for AAT –  
369 conventionally associated with muscle and liver metabolism<sup>30,31</sup> – found both AAT1 and AAT2 to be  
370 expressed in photoreceptor inner segments and cell bodies (Figure 7D). This confirmed that  
371 photoreceptors can execute the mini-Krebs cycle, while NAA production identified in the metabolomic  
372 data demonstrated that this cycle was indeed used.

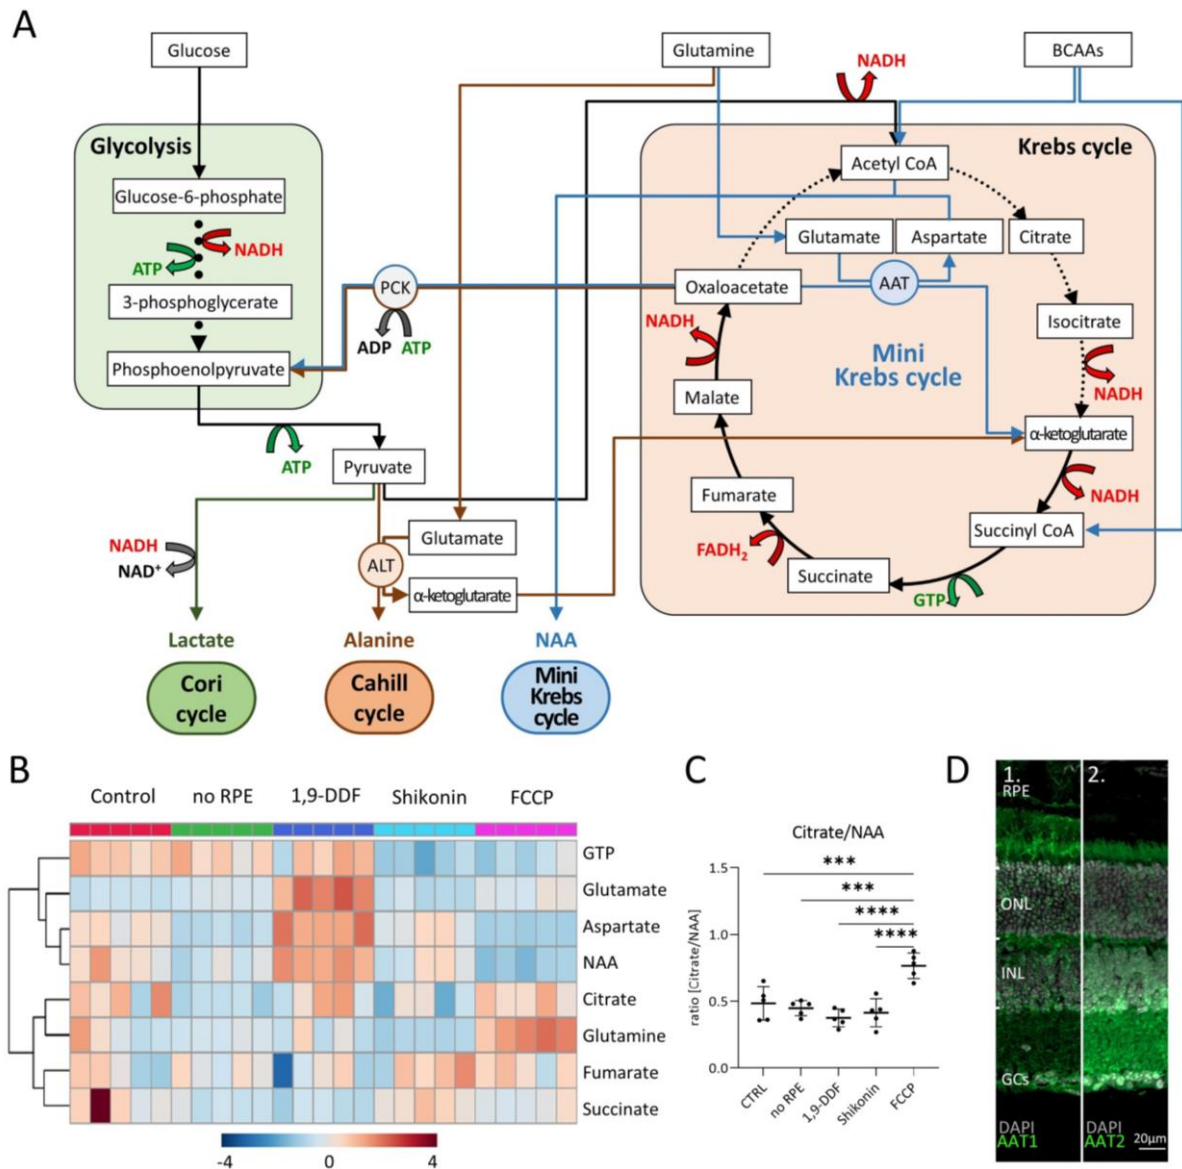

373

374 **Figure 7. Metabolic pathways in the retina, key metabolites, and expression of aspartate amino**  
 375 **transferase (AAT).** (A) Overview of main metabolic pathways and metabolites. Execution of Cori-  
 376 (green arrows), Cahill -(brown), or mini-Krebs- cycle (blue) releases the signature metabolites lactate,  
 377 alanine, and N-acetylaspartate (NAA), respectively. Key enzymes of the Cahill- and mini-Krebs- cycle  
 378 are alanine transaminase (ALT) and AAT. (B) Hierarchical clustering of eight metabolites connected to  
 379 Krebs- and mini-Krebs- cycle. (C) Ratio NAA vs. citrate, representing full and mini-Krebs cycle. Data  
 380 represented as ratio of individual data points with mean  $\pm$  SD. (D) AAT-1 and -2 staining (green) with  
 381 DAPI (grey) as nuclear counterstain.

382

383 Finally, we compared the energetic efficiencies of glycolysis, Krebs-, Cori-, Cahill-, and mini-Krebs- cycle  
 384 (Figure 8). Using anaplerotic substrates in the Cahill- and mini-Krebs- cycle allows for far more efficient  
 385 energy production compared to the Cori cycle. Moreover, mitochondrial PCK2 can regenerate pyruvate  
 386 from oxaloacetate. Assuming that one mole of NADH/FADH<sub>2</sub> can be used to generate three moles of

387 ATP via OXPHOS, and depending on the exact stoichiometry of glutamate/BCAA input, the mini-Krebs  
 388 cycle can deliver up to 18 moles of ATP and 2 moles of GTP per 3 carbon unit. Astonishingly, this is  
 389 more than the 15 moles of ATP and 1 mole of GTP generated in the “full” Krebs cycle.

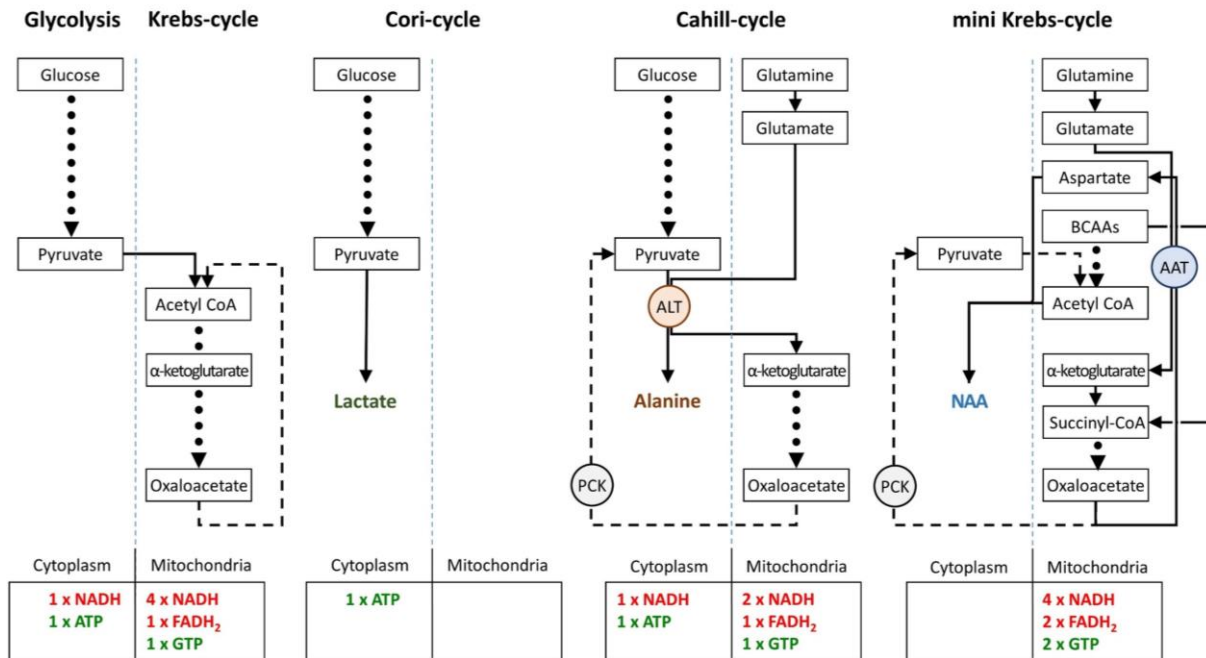

390  
 391 **Figure 8. Comparison of metabolic pathways and their energetic efficiencies.** Compared to the Cori-  
 392 cycle, both Cahill- and mini-Krebs cycles are highly efficient. Their key enzymes – alanine transaminase  
 393 (ALT) and aspartate amino transferase (AAT), respectively – generate alanine and aspartate/ N-  
 394 acetylaspartate (NAA). Pyruvate carboxy kinase (PCK), either in cytoplasm or within mitochondria, may  
 395 reconstitute pyruvate from oxaloacetate. Note that energy output of each pathway was calculated  
 396 based on input of pyruvate (three carbons) or glutamate/acetyl-CoA (three carbons).

397

## 398 Discussion

399 This study combines retinal cellular enzyme expression patterns with quantitative metabolomics. In an  
 400 entirely controlled environment, this enabled a comprehensive assessment of retinal metabolism and  
 401 allowed to analyse the impact of different experimental conditions on cell death and survival of retinal  
 402 cells. As opposed to earlier works, our study highlights the crucial importance of OXPHOS and  
 403 anaplerotic pathways for the maintenance and survival of rod and cone photoreceptors. Importantly,  
 404 we show that photoreceptors can uncouple glycolysis and Krebs cycle using a NAA producing shunt,  
 405 allowing optimal function of both pathways, and solving a long-standing problem in energy metabolism

406 research. Because of the ramifications for overall cellular physiology, these findings will be highly  
407 relevant for future therapy developments, for retinal diseases, as well as for neurodegenerative and  
408 metabolic diseases in general.

409 Under anaerobic conditions the production of lactate from glucose is a hallmark of skeletal muscle  
410 function. Here, pyruvate is reduced to lactate, which enters the bloodstream to serve as substrate for  
411 liver gluconeogenesis. Glucose can then cycle back to the muscle. This glucose-lactate cycle between  
412 muscle and liver was discovered in the 1930s and is referred to as Cori cycle<sup>32</sup>. The release of large  
413 amounts of lactate from isolated retina suggested that also the retina might use the Cori cycle, albeit  
414 under aerobic conditions<sup>33</sup>. Photoreceptors have thus been proposed to consume primarily glucose via  
415 aerobic glycolysis<sup>10,11</sup>. The resultant lactate would be used as fuel in the Krebs cycle by RPE and MGCs,  
416 generating ATP via OXPHOS. However, this hypothesis is contradicted by the high density of  
417 mitochondria in photoreceptor inner segments<sup>34</sup>. Moreover, key enzymes for Krebs cycle (CS, FH,  
418 SUCLG1) and OXPHOS (COX, ATP synthase  $\gamma$ ) were strongly expressed in photoreceptors, but showed  
419 little or no expression in RPE or MGCs, in agreement with previous research<sup>35</sup>. When we cultured retina  
420 *without* RPE, as done by Warburg and others<sup>3,4,10</sup>, we confirmed a strong lactate production. Yet, in  
421 retina cultured *with* RPE, lactate production was minor. Moreover, retina without RPE still produced  
422 large amounts of GTP, likely stemming from SUCLG1 activity and demonstrating Krebs cycle operation  
423 in photoreceptors. Neuroretina without RPE displayed reduced viability of both rod and cone  
424 photoreceptors, as well as an accumulation of BCAAs and lactate. In contrast, the block of glucose  
425 import into the RPE by treatment with 1,9-DDF<sup>19</sup> resulted in a depletion of BCAAs and other AAs, and  
426 an increase of retinal ATP, demonstrating a switch from glycolytic to anaplerotic metabolism<sup>29</sup>. We  
427 show that photoreceptors consume both glucose and anaplerotic substrates as fuels, and that retinal  
428 metabolism switches to aerobic glycolysis only in the absence of RPE. This switch is likely driven by  
429 increased glucose uptake. Normally, tight junction-coupled RPE cells form the outer blood-retinal  
430 barrier and prevent direct access of glucose to photoreceptors<sup>36</sup>. In the absence of RPE,  
431 photoreceptors expressing the high affinity/high capacity GLUT3 become “flooded” with glucose. The



432 resultant Crabtree effect then causes a shutdown of Krebs cycle activity<sup>17,37,38</sup>. Taken together, the high  
433 rates of retinal aerobic glycolysis first reported by Otto Warburg are likely an artefact of the absence  
434 of RPE, while intact retina strongly relies on OXPHOS for its energy production.

435 Treatment with FCCP revealed striking differences between rod and cone energy metabolism. FCCP  
436 eliminates the proton gradient between inner mitochondrial membrane and mitochondrial matrix,  
437 abolishing ATP synthesis<sup>22</sup>. Initially, FCCP may increase Krebs cycle activity to attempt restoration of  
438 mitochondrial proton gradient<sup>39</sup>, increasing oxidative stress<sup>40</sup> and oxidative DNA damage. The  
439 resultant activation of PARP would deplete NAD<sup>+</sup>, further aggravating metabolic stress<sup>41</sup>. Although  
440 FCCP had a strong toxic effect on rod photoreceptors, remarkably, cone photoreceptors were almost  
441 completely preserved. In striking contrast to the FCCP effect was that of the 1,9-DDF block on GLUT1<sup>19</sup>.  
442 Although GLUT1 was only expressed in the RPE, glucose entering the RPE is shuttled forward to  
443 photoreceptors<sup>10</sup>. Remarkably, with 1,9-DDF, over 90% of cones were lost, while the detrimental effect  
444 on rods was comparatively minor. These differential effects of FCCP and 1,9-DDF strongly suggest that  
445 glycolysis is sufficient and necessary for cone survival. Conversely, rods require OXPHOS for their  
446 survival, while glycolysis is of minor importance. In line with these interpretations, cone viability  
447 relative to rods was also strongly compromised in the no RPE situation, indicating that an intact blood-  
448 retinal barrier<sup>36</sup> and regulation of glucose access was important for cone survival. We note that GLUT2  
449 may also contribute to photoreceptor glucose uptake<sup>42</sup>.

450 The lactate-generating Cori cycle<sup>32</sup> is highly inefficient and in intact retina likely plays only a minor role.  
451 An efficient pathway is the glucose-alanine cycle, or Cahill cycle, in which pyruvate, instead of being  
452 reduced to lactate, is transaminated to alanine<sup>25</sup>. This preserves NADH and generates  $\alpha$ -keto acids to  
453 fuel the Krebs cycle. The alanine generated enters the bloodstream and is taken up by the liver, where  
454 the ammonia is excreted in the form of urea, while the carbon backbone is used for gluconeogenesis.  
455 The key enzyme for the Cahill cycle is ALT, conventionally associated with muscle and liver<sup>30,31</sup>.  
456 Previously, ALT was found in glial cells of the honeybee retina<sup>43</sup>, and ALT activity was detected in rat  
457 retinal tissue lysates<sup>44</sup>. In our study, the localization of ALT in photoreceptors and inner retinal neurons,

458 combined with our metabolomic datasets, demonstrated the operation of the Cahill cycle in the  
459 mammalian retina. Moreover, the expression of mitochondrial PCK2 in cones facilitates the efficient  
460 uncoupling of glycolysis from the Krebs cycle, suggesting that cones may use the Cahill cycle for very  
461 effective energy production.

462 MGCs are known for their uptake of extracellular glutamate and use for glutamine synthesis. In fact,  
463 in retinal histology, glutamate-aspartate transporter (GLAST) and glutamine synthase (GS) have been  
464 widely used as markers for MGCs<sup>28,35,45</sup>. Glutaminase C (GAC) converts glutamine back to glutamate,  
465 which may then serve as a substrate for the mini-Krebs cycle. We localized GAC in inner retinal neurons  
466 and photoreceptors, with a particularly strong expression in cone inner segments. Since ALT was  
467 strongly expressed in cone inner segments as well, cones can use glutaminolysis to obtain extra  
468 glutamate for pyruvate transamination in the Cahill cycle. This may also explain why the glycolysis  
469 inhibitor Shikonin reduced cone viability much less than that of rods.

470 The regeneration of the photoreceptor photopigment retinal is performed by the RPE<sup>13</sup>. Recently,  
471 retinal has been proposed to form a Schiff base adduct with taurine, which would act as a retinal carrier  
472 and buffer<sup>46</sup>. We found that retina cultured with RPE harboured high levels of taurine and low levels  
473 of hypotaurine, while retina without RPE displayed low levels of taurine and high levels of hypotaurine.  
474 Our taurine immunostaining found essentially no taurine in the RPE, while photoreceptor inner  
475 segments and synapses displayed very high taurine levels. Together, these findings suggest a  
476 hypotaurine-taurine shuttle between RPE and photoreceptors. In the RPE taurine can be reduced to  
477 hypotaurine and shuttled back to photoreceptors where oxidation by hypotaurine dehydrogenase<sup>47,48</sup>  
478 may reconstitute taurine, yielding additional NADH for OXPHOS. The net effect of this hypotaurine-  
479 taurine shuttle would be a transfer of reducing power from RPE to photoreceptors, boosting  
480 photoreceptor ATP production via OXPHOS.

481 A key problem in the understanding of cellular energy metabolism is the relationship between fast but  
482 inefficient glycolysis and slow but efficient Krebs cycle/OXPHOS<sup>49,50</sup>. Both pathways are coupled via  
483 pyruvate and the different metabolic flow rates reduce the efficiency of energy production, *e.g.*, via

484 feedback inhibition<sup>51</sup>. Pyruvate coupling is especially problematic in high and rapidly changing energy  
485 demand such as in neurons and photoreceptors<sup>52</sup>. Uncoupling glycolysis and Krebs cycle via the Cori  
486 cycle is extremely wasteful and likely insufficient to satisfy long-term photoreceptor energy demand.  
487 By comparison, the Cahill cycle delivers additional NADH when using pyruvate derived from glycolysis,  
488 and cones may use the Cahill cycle for uncoupling from glycolysis. An alternative pathway is the mini-  
489 Krebs cycle, essentially an oxaloacetate to  $\alpha$ -ketoglutarate shunt<sup>29</sup>. This cycle uses glutamate, glutamine,  
490 and BCAAs as fuels to run mitochondrial respiration independent of glycolysis. The key step of the mini-  
491 Krebs cycle is the transamination of oxaloacetate/glutamate to aspartate/ $\alpha$ -ketoglutarate by AAT.  $\alpha$ -  
492 ketoglutarate is then metabolized to oxaloacetate, generating NADH, FADH<sub>2</sub>, and GTP. Acetyl-CoA  
493 generated from BCAAs or pyruvate is used to create NAA, the end product of the mini-Krebs cycle. We  
494 found mitochondrial AAT2 to be expressed in rod inner segments, in agreement with an early  
495 cytochemical study<sup>53</sup>. This indicates that the mini-Krebs cycle is used primarily by rods, explaining their  
496 selective vulnerability to FCCP treatment. Crucially, the mini-Krebs cycle is more energy-efficient than  
497 the Cahill cycle and generates NAA instead of alanine as net product. Both metabolites serve the  
498 purpose of disposing of excess ammonia originating from AA input<sup>54,55</sup>. NAA in the human brain is one  
499 of the most abundant metabolites and is routinely used in clinical MRI diagnosis to visualize brain  
500 health<sup>56,57</sup>. While different functions have been hypothesized for NAA<sup>58,59</sup>, our work proposes NAA as  
501 a signature metabolite for the mini-Krebs cycle. Indeed, a recent study using Raman spectroscopy  
502 imaging detected high levels of NAA in the human retina, demonstrating *in vivo* use of this cycle<sup>60</sup>.  
503 Importantly, the 6-step mini-Krebs cycle is significantly faster than the 10-step Krebs cycle<sup>29</sup> and is  
504 uncoupled from glycolysis. In rods, PCK1 may allow to replenish cytoplasmic acetyl-CoA pools from  
505 oxaloacetate, if BCAA-derived input was insufficient.

506 Overall, the different pathways outlined here provide photoreceptor cells with a remarkable versatility  
507 and flexibility, allowing to dynamically adapt the timing and quantitative output of energy metabolism.  
508 The differences between rod and cone metabolism may be related to their response kinetics and  
509 sensitivities. Importantly, our study highlights the significance of the Krebs cycle and OXPHOS for rods,

510 as well as the strong reliance of cones on glycolysis. We demonstrate the ability of photoreceptors to  
511 flexibly uncouple glycolysis from mitochondrial respiration, allowing both processes to run at optimum,  
512 and producing the characteristic signature metabolites lactate (Cori cycle), alanine (Cahill cycle), and  
513 NAA (mini-Krebs cycle). These metabolites can reveal energy or disease status and could serve as  
514 readout and guide for the design of novel therapeutic interventions. Given the general importance of  
515 energy metabolism, the significance of our findings extends beyond the retina, for instance, to other  
516 neurodegenerative and metabolic diseases.

517 **Acknowledgements**

518 We thank N. Rieger and M. Owczorz for first-rate technical support and James B. Hurley (University of  
519 Washington) for helpful comments and suggestions. This work was funded by the ProRetina  
520 Foundation, the Zinke heritage foundation, the Werner Siemens Foundation, the Chinese scholarship  
521 council (CSC), ANID-FONDECYT No. 1210790 (OS) and PhD grant BECAS CHILE/2018 -21180443 (VC).

522

523 **Author Contributions**

524 Conceptualization, Y.C., L.Z., F.P.D., and C.T.; Methodology, Y.C., L.Z., F.P.D., and C.T.; Investigation,  
525 Y.C., L.Z., S.Y., F.P.D., and C.T.; Writing – original draft, Y.C., L.Z., F.P.D., and C.T.; Writing – Review &  
526 Editing, F.W.H., O.S. and V.C.; Supervision, F.P.D., and C.T.; Funding acquisition, F.P.D., and C.T.

527

528 **Declaration of Interests**

529 The authors declare no competing financial interests.

530 **MATERIALS AND METHODS**

531

532 **RESOURCE AVAILABILITY**

533 **Lead contact**

534 Further information and requests for resources and reagents should be directed to and will be fulfilled

535 by the lead contact, François Paquet-Durand ([francois.paquet-durand@klinikum.uni-tuebingen.de](mailto:francois.paquet-durand@klinikum.uni-tuebingen.de)).

536 **Materials availability**

537 The study did not generate new unique reagents.

538 **Data and Code availability**

539 Any additional information required to reanalyze the data reported in this paper is available from the

540 lead contact upon request. This paper does not report original code.

541

542 **METHOD DETAILS**

543 **Animals**

544 *C3H* wild-type (WT) mice were used<sup>61</sup>. All efforts were made to minimize the number of animals used

545 and their suffering. Animals were housed under standard white cyclic lighting, had free access to food

546 and water, and were used irrespective of gender. Protocols compliant with the German law on animal

547 protection were reviewed and approved by the “Einrichtung für Tierschutz, Tierärztlichen Dienst und

548 Labortierkunde” of the University of Tübingen and were following the association for research in vision

549 and ophthalmology (ARVO) statement for the use of animals in vision research. Animals were not

550 assigned to experimental groups prior to their sacrifice.

551 **Retinal explant cultures**

552 The retinal explantation procedure and long-term cultivation in defined medium, free of serum and  
553 antibiotics, is described in detail in<sup>18</sup>. Briefly, mice were decapitated at postnatal day (P) 9 and the  
554 heads cleaned with 70% ethanol. The eyes were removed under aseptic conditions, and placed into  
555 R16 basal medium (BM; Gibco, Paisley, UK), washed for 5 min, followed by a 15 min incubation in 0.12%  
556 Proteinase K (Sigma-Aldrich Chemie GmbH, Taufkirchen, Germany; P6556) at 37°C to predigest the  
557 sclera and to allow for an easy separation of the retina together with its retinal pigment epithelium  
558 (RPE). Then, the eyes were placed for 5 min in BM with 10% foetal calf serum (FCS) to deactivate  
559 Proteinase K. In the case of no RPE explants, the retina was explanted directly, without Proteinase K  
560 pre-treatment and FCS deactivation. Under the microscope and sterile conditions, the anterior  
561 segment, lens, and vitreous body were carefully removed from the eyeballs, the optic nerve was cut,  
562 and the retinas were removed from the sclera. Then four incisions were made into the retina to give a  
563 flat, clover leaf like structure that was transferred to a culturing membrane (sterile 24 mm insert with  
564 0.4 µm polycarbonate membrane, Corning-Costar, New York, NY, USA), with the ganglion cell layer  
565 facing up. Subsequently, culturing membranes were placed in six-well culture plates (BD Biosciences,  
566 San Jose, CA, USA) and incubated in 1 ml of R16 complete medium (CM) with supplements<sup>62</sup>, at 37°C,  
567 in a humidified incubator with 5% CO<sub>2</sub>. From P9 to P11 cultures were kept in CM, treatments with  
568 50µM 1,9-DDF and 4µM Shikonin were applied from P11 until P15, while 5µM FCCP treatment was  
569 applied from P13 to P15. The medium was changed every 2 days.

570 Culturing was stopped by 45 min fixation in 4% paraformaldehyde (PFA), cryoprotected with graded  
571 sucrose solutions containing 10, 20, and 30% sucrose and then embedded in Tissue-Tek O.C.T.  
572 compound (Sakura Finetek Europe, Alphen aan den Rijn, Netherlands). Tissue sections of 12 µm were  
573 prepared using Thermo Scientific NX50 microtome (Thermo Scientific, Waltham, MA) and thaw-  
574 mounted onto Superfrost Plus glass slides (R. Langenbrinck, Emmendingen, Germany).

575 **Cell death detection (TUNEL assay)**

576 Fixed slides were dried at 37°C for 30 min and washed in phosphate buffered saline (PBS) solution at  
577 room temperature (RT), for 15 min. Afterwards, the slides were placed in TRIS buffer with proteinase  
578 K at 37°C for 5 min to inactivate nucleases. The slides were then washed with TRIS buffer (10 mM TRIS-  
579 HCL, pH 7.4), 3 times for 5 minutes each. Subsequently, the slides were placed in ethanol-acetic acid  
580 mixture (70:30) at -20°C for 5 min followed by 3 washes in TRIS buffer and incubation in blocking  
581 solution (10% normal goat serum, 1% bovine serum albumin, 1% fish gelatine in 0.1% PBS-Triton X100)  
582 for 1h at RT. Lastly, the slides were placed in the terminal dUTP-nick-end labelling (TUNEL) solution  
583 (labelling with either fluorescein or tetra-methyl-rhodamine; Roche Diagnostics GmbH, Mannheim,  
584 Germany) in 37°C for 1 h and mounted with Vectashield with DAPI (Vector, Burlingame, CA, USA)  
585 thereafter.

586

587 **Immunofluorescence**

588 Fixed slides were dried at 37°C for 30 min and rehydrated for 10 min in PBS at RT. For  
589 immunofluorescent labelling, the slides were incubated with blocking solution (10% normal goat  
590 serum, 1% bovine serum albumin in 0.3% PBS-Triton X 100) for 1 h at RT. The primary antibodies were  
591 diluted (see table 1) in blocking solution and incubated at 4°C overnight. The slides were then washed  
592 with PBS, 3 times for 10 min each. Subsequently, the secondary antibody, diluted in PBS (see table 1),  
593 was applied to the slides, and incubated for 1 h at RT. Lastly, the slides were washed with PBS and  
594 mounted with Vectashield with DAPI (Vector).



| REAGENT or RESOURCE                                          | SOURCE                    | IDENTIFIER                         |
|--------------------------------------------------------------|---------------------------|------------------------------------|
| <b>Antibodies</b>                                            |                           |                                    |
| Mouse monoclonal anti-RPE65                                  | Thermo Fisher Scientific  | Cat# MA5-16042, RRID: AB_11151857  |
| Rabbit polyclonal anti-GLUT1                                 | Abcam                     | Cat# ab652, RRID:AB_305540         |
| Rabbit polyclonal anti-GLUT3                                 | Abcam                     | Cat# ab41525, RRID:AB_732609       |
| Rabbit monoclonal anti-PKM1                                  | Cell Signaling Technology | Cat# 7067, RRID: AB_2715534        |
| Rabbit monoclonal anti-PKM2                                  | Cell Signaling Technology | Cat# 4053, RRID: AB_1904096        |
| Mouse monoclonal anti-Cytochrome C                           | Molecular Probes          | Cat# A-6403, RRID: AB_221582       |
| Rabbit polyclonal anti-Cone arrestin                         | Sigma-Aldrich             | Cat# AB15282; RRID:AB_1163387      |
| Rabbit polyclonal anti-Citrate synthase                      | GeneTex                   | Cat# GTX110624, RRID: AB_1950045   |
| Rabbit polyclonal anti-ATP synthase gamma                    | GeneTex                   | Cat# GTX114275S, RRID: AB_10726795 |
| Rabbit polyclonal anti- Fumarate hydratase                   | GeneTex                   | Cat# GTX109877, RRID: AB_1950283   |
| Rabbit polyclonal anti- Taurine                              | Abcam                     | Cat# ab9448, RRID: AB_307261       |
| Rabbit monoclonal anti-Alanine transaminase (AAT1)           | Abcam                     | Cat# ab202083, RRID:AB_2915976     |
| Rabbit polyclonal anti-SUCLG1                                | Novus Biologicals         | Cat# NBP1-32728, RRID: AB_2286802  |
| Rabbit polyclonal anti-Glutamine synthetase                  | Abcam                     | Cat# ab73593, RRID: AB_2247588     |
| Rabbit polyclonal anti- Glutaminase C (GAC)                  | GeneTex                   | Cat# GTX131263, RRID: AB_2886452   |
| Rabbit polyclonal anti- PCK1                                 | Affinity Biosciences      | Cat# DF6770, RRID:AB_2838732       |
| Rabbit monoclonal anti- PCK2                                 | Novus Biologicals         | Cat# NBP2-75610 RRID: AB_2915974   |
| Peanut agglutinin (PNA)                                      | Vector laboratories       | Cat# FL-1071, RRID:AB_2315097      |
| Rabbit polyclonal anti- Aspartate aminotransferase1          | Abcam                     | Cat# ab221939, RRID: AB_2915980    |
| Rabbit polyclonal anti- FABP-1 (Aspartate aminotransferase2) | Abcam                     | Cat# ab153924, RRID:AB_2915981     |

595 **Table 1:** Primary and secondary antibodies used in the study, providers, and dilutions.

596

597 **Microscopy, cell counting, and statistical analysis**

598 Fluorescence microscopy was performed with a Z1 Apotome microscope equipped with a Zeiss

599 Axiocam digital camera (Zeiss, Oberkochen, Germany). Images were captured using Zen software (Zeiss)

600 and the Z-stack function (14-bit depth, 2752\*2208 pixels, pixel size = 0.227  $\mu$ m, 9 Z-planes at 1  $\mu$ m

601 steps). The raw images were converted into maximum intensity projections using Zen software and  
602 saved as TIFF files.

603 Photoreceptors stained by the TUNEL assay were counted manually on three images per explant, the  
604 average cell number in a given ONL area was estimated based on DAPI staining and used to calculate  
605 the percentage of TUNEL positive cells. Adobe Photoshop CS6 (Adobe Systems Incorporated, San Jose,  
606 CA) and Adobe Illustrator CC 2019 software was used for primary image processing. All data given  
607 represent the means and standard deviation from at least 5 different animals. Statistical comparisons  
608 between experimental groups were made using Student's paired t-test (*cf.* Figure 1) or ANOVA and  
609 multiple comparisons correction (*cf.* Figures 1) using Graph Pad Prism 9.1 for Windows (Graph Pad  
610 Software, La Jolla, CA). Levels of significance were as follows: \* =  $p < 0.05$ ; \*\* =  $p < 0.01$ ; \*\*\* =  $p < 0.001$ .

611

#### 612 **Metabolite extraction**

613 After retinal explant culture, the tissue was quickly transferred into 80% methanol / 20% ethanol, snap-  
614 frozen in liquid nitrogen, and further subjected to metabolite extraction via ultra-sonication (Covaris  
615 E220 Evolution, Woburn, USA). Retinal tissue was collected in 400  $\mu$ L of methanol (LC-MS grade),  
616 transferred to the 2 mL glass Covaris system-compatible tubes and 800  $\mu$ L of methyl-*tert*-butyl ether  
617 (MTBE) was added and thoroughly mixed. After the extraction, 400  $\mu$ L of ultrapure water were added  
618 for two-phase liquid separation. The aqueous phase was separated and evaporated to dryness.

619

#### 620 **Sample preparation for $^1\text{H-NMR}$ spectroscopy measurements and data analysis**

621 Dried metabolite pellets were resuspended in a deuterated phosphate buffer (pH corrected for 7.4)  
622 with 1 mM of 3-(trimethylsilyl) propionic-2,2,3,3-d<sub>4</sub> acid sodium salt (TSP) as internal standard. NMR  
623 spectra were recorded at 298 K on a 14.1 Tesla ultra-shielded NMR spectrometer at 600 MHz proton  
624 frequency (Avance III HD, Bruker BioSpin, Germany) equipped with a triple resonance 1.7 mm room

625 temperature micro probe. Short zero-go (zg), 1D nuclear Overhauser effect spectroscopy (NOESY) and  
626 Carr-Purcell-Meiboom-Gill (CPMG, 1024 scans) pulse programs were used for spectra acquisition.  
627 Spectra were processed with Bruker TopSpin 3.6.1 software (Bruker BioSpin, Ettlingen, Germany).

628

#### 629 **Quantification and statistical analysis**

630 Metabolite assignments for quantification were performed with ChenomX NMR Suite 8.5 (Chenomx  
631 Inc., Edmonton, Canada). Statistical analysis was performed with MetaboAnalyst 5.0 platform  
632 (<https://www.metaboanalyst.ca><sup>63</sup>) and GraphPad Prism 9.1.0 software (GraphPad Software, San Diego,  
633 CA, USA). Metabolite pathway analysis and pathway impact values were based on Kyoto Encyclopaedia  
634 of Genes and Genomes (KEGG) pathway database.

635 **References**

- 636 1. Country, M.W. Retinal metabolism: A comparative look at energetics in the retina. *Brain Res*  
637 **1672**, 50-57 (2017).
- 638 2. Wong-Riley, M.T. Energy metabolism of the visual system. *Eye Brain* **2**, 99-116 (2010).
- 639 3. Winkler, B.S. Glycolytic and oxidative metabolism in relation to retinal function. *J Gen Physiol*  
640 **77**, 667-692 (1981).
- 641 4. Warburg, O. The Metabolism of Carcinoma Cells. *The Journal of Cancer Research* **9**, 148-163  
642 (1925).
- 643 5. Okawa, H., Sampath, A.P., Laughlin, S.B. & Fain, G.L. ATP consumption by mammalian rod  
644 photoreceptors in darkness and in light. *Curr Biol* **18**, 1917-1921 (2008).
- 645 6. Ames, A., 3rd. Energy requirements of CNS cells as related to their function and to their  
646 vulnerability to ischemia: a commentary based on studies on retina. *Can J Physiol Pharmacol*  
647 **70 Suppl**, S158-164 (1992).
- 648 7. Chinchore, Y., Begaj, T., Wu, D., Drokhyansky, E. & Cepko, C.L. Glycolytic reliance promotes  
649 anabolism in photoreceptors. *Elife* **6**(2017).
- 650 8. Young, R.W. The renewal of photoreceptor cell outer segments. *J Cell Biol* **33**, 61-72 (1967).
- 651 9. Ingram, N.T., Fain, G.L. & Sampath, A.P. Elevated energy requirement of cone  
652 photoreceptors. *Proceedings of the National Academy of Sciences* **117**, 19599-19603 (2020).
- 653 10. Kanow, M.A., *et al.* Biochemical adaptations of the retina and retinal pigment epithelium  
654 support a metabolic ecosystem in the vertebrate eye. *Elife* **6**(2017).
- 655 11. Sinha, T., Naash, M.I. & Al-Ubaidi, M.R. The Symbiotic Relationship between the Neural  
656 Retina and Retinal Pigment Epithelium Is Supported by Utilizing Differential Metabolic  
657 Pathways. *iScience* **23**, 101004 (2020).
- 658 12. Viegas, F.O. & Neuhaus, S.C.F. A Metabolic Landscape for Maintaining Retina Integrity and  
659 Function. *Front Mol Neurosci* **14**, 656000 (2021).
- 660 13. Redmond, T.M., *et al.* Rpe65 is necessary for production of 11-cis-vitamin A in the retinal  
661 visual cycle. *Nat Genet* **20**, 344-351 (1998).
- 662 14. Swarup, A., *et al.* Modulating GLUT1 expression in retinal pigment epithelium decreases  
663 glucose levels in the retina: impact on photoreceptors and Müller glial cells. *Am J Physiol Cell*  
664 *Physiol* **316**, C121-c133 (2019).
- 665 15. Takata, K., Kasahara, T., Kasahara, M., Ezaki, O. & Hirano, H. Erythrocyte/HepG2-type glucose  
666 transporter is concentrated in cells of blood-tissue barriers. *Biochem Biophys Res Commun*  
667 **173**, 67-73 (1990).
- 668 16. Takata, K., Kasahara, T., Kasahara, M., Ezaki, O. & Hirano, H. Ultracytochemical localization of  
669 the erythrocyte/HepG2-type glucose transporter (GLUT1) in cells of the blood-retinal barrier  
670 in the rat. *Invest Ophthalmol Vis Sci* **33**, 377-383 (1992).
- 671 17. Simpson, I.A., *et al.* The facilitative glucose transporter GLUT3: 20 years of distinction. *Am J*  
672 *Physiol Endocrinol Metab* **295**, E242-253 (2008).
- 673 18. Belhadj, S., *et al.* Long-Term, Serum-Free Cultivation of Organotypic Mouse Retina Explants  
674 with Intact Retinal Pigment Epithelium. *J Vis Exp* (2020).
- 675 19. Joost, H.G., Habberfield, A.D., Simpson, I.A., Laurenza, A. & Seamon, K.B. Activation of  
676 adenylate cyclase and inhibition of glucose transport in rat adipocytes by forskolin  
677 analogues: structural determinants for distinct sites of action. *Mol Pharmacol* **33**, 449-453  
678 (1988).
- 679 20. Chen, J., *et al.* Shikonin and its analogs inhibit cancer cell glycolysis by targeting tumor  
680 pyruvate kinase-M2. *Oncogene* **30**, 4297-4306 (2011).
- 681 21. Zhao, X., *et al.* Shikonin Inhibits Tumor Growth in Mice by Suppressing Pyruvate Kinase M2-  
682 mediated Aerobic Glycolysis. *Scientific Reports* **8**, 14517 (2018).
- 683 22. Kessler, R.J., Tyson, C.A. & Green, D.E. Mechanism of uncoupling in mitochondria: uncouplers  
684 as ionophores for cycling cations and protons. *Proc Natl Acad Sci U S A* **73**, 3141-3145 (1976).

- 685 23. Ortin-Martinez, A., *et al.* Number and distribution of mouse retinal cone photoreceptors:  
686 differences between an albino (Swiss) and a pigmented (C57/BL6) strain. *PLoS one* **9**, e102392  
687 (2014).
- 688 24. Jeon, C.J., Strettoi, E. & Masland, R.H. The major cell populations of the mouse retina. *J*  
689 *Neurosci* **18**, 8936-8946 (1998).
- 690 25. Felig, P. The glucose-alanine cycle. *Metabolism* **22**, 179-207 (1973).
- 691 26. Bai, P. Biology of Poly(ADP-Ribose) Polymerases: The Factotums of Cell Maintenance. *Mol*  
692 *Cell* **58**, 947-958 (2015).
- 693 27. Paquet-Durand, F., *et al.* Excessive activation of poly(ADP-ribose) polymerase contributes to  
694 inherited photoreceptor degeneration in the retinal degeneration 1 mouse. *J Neurosci* **27**,  
695 10311-10319 (2007).
- 696 28. Riepe, R.E. & Norenburg, M.D. Müller cell localisation of glutamine synthetase in rat retina.  
697 *Nature* **268**, 654-655 (1977).
- 698 29. Yudkoff, M., Nelson, D., Daikhin, Y. & Erecińska, M. Tricarboxylic acid cycle in rat brain  
699 synaptosomes. Fluxes and interactions with aspartate aminotransferase and  
700 malate/aspartate shuttle. *J Biol Chem* **269**, 27414-27420 (1994).
- 701 30. Nathwani, R.A., Pais, S., Reynolds, T.B. & Kaplowitz, N. Serum alanine aminotransferase in  
702 skeletal muscle diseases. *Hepatology* **41**, 380-382 (2005).
- 703 31. Kim, W.R., Flamm, S.L., Di Bisceglie, A.M. & Bodenheimer, H.C. Serum activity of alanine  
704 aminotransferase (ALT) as an indicator of health and disease. *Hepatology* **47**, 1363-1370  
705 (2008).
- 706 32. Cori, C.F. & Cori, G.T. Carbohydrate metabolism. *Annu Rev Biochem* **15**, 193-218 (1946).
- 707 33. Rajala, R.V.S. Aerobic Glycolysis in the Retina: Functional Roles of Pyruvate Kinase Isoforms.  
708 *Frontiers in Cell and Developmental Biology* **8**(2020).
- 709 34. Giarmarco, M.M., *et al.* Daily mitochondrial dynamics in cone photoreceptors. *Proc Natl Acad*  
710 *Sci U S A* **117**, 28816-28827 (2020).
- 711 35. Rueda, E.M., *et al.* The cellular and compartmental profile of mouse retinal glycolysis,  
712 tricarboxylic acid cycle, oxidative phosphorylation, and  $\sim$ P transferring kinases. *Mol Vis* **22**,  
713 847-885 (2016).
- 714 36. O'Leary, F. & Campbell, M. The blood-retina barrier in health and disease. *Febs j* (2021).
- 715 37. Diaz-Ruiz, R., Rigoulet, M. & Devin, A. The Warburg and Crabtree effects: On the origin of  
716 cancer cell energy metabolism and of yeast glucose repression. *Biochimica et Biophysica Acta*  
717 *(BBA) - Bioenergetics* **1807**, 568-576 (2011).
- 718 38. Crabtree, H.G. Observations on the carbohydrate metabolism of tumours. *Biochem J* **23**, 536-  
719 545 (1929).
- 720 39. Balcke, G.U., *et al.* Linking energy metabolism to dysfunctions in mitochondrial respiration--a  
721 metabolomics in vitro approach. *Toxicol Lett* **203**, 200-209 (2011).
- 722 40. Dugan, L.L., *et al.* Mitochondrial production of reactive oxygen species in cortical neurons  
723 following exposure to N-methyl-D-aspartate. *J Neurosci* **15**, 6377-6388 (1995).
- 724 41. Schreiber, V., Dantzer, F., Ame, J.C. & de Murcia, G. Poly(ADP-ribose): novel functions for an  
725 old molecule. *Nat Rev Mol Cell Biol* **7**, 517-528 (2006).
- 726 42. Yang, M., *et al.* Expression of glucose transporter-2 in murine retina: Evidence for glucose  
727 transport from horizontal cells to photoreceptor synapses. *J Neurochem* **160**, 283-296 (2022).
- 728 43. Tsacopoulos, M., Veuthey, A.L., Saravelos, S.G., Perrottet, P. & Tsoupras, G. Glial cells  
729 transform glucose to alanine, which fuels the neurons in the honeybee retina. *J Neurosci* **14**,  
730 1339-1351 (1994).
- 731 44. LaNoue, K.F., *et al.* Role of specific aminotransferases in de novo glutamate synthesis and  
732 redox shuttling in the retina. *J Neurosci Res* **66**, 914-922 (2001).
- 733 45. Danbolt, N.C. Glutamate uptake. *Prog Neurobiol* **65**, 1-105 (2001).
- 734 46. Kim, H.J., Zhao, J. & Sparrow, J.R. Vitamin A aldehyde-taurine adduct and the visual cycle.  
735 *Proceedings of the National Academy of Sciences* **117**, 24867-24875 (2020).

- 736 47. Veeravalli, S., *et al.* Flavin-Containing Monooxygenase 1 Catalyzes the Production of Taurine  
737 from Hypotaurine. *Drug Metab Dispos* **48**, 378-385 (2020).
- 738 48. Sumizu, K. Oxidation of hypotaurine in rat liver. *Biochim Biophys Acta* **63**, 210-212 (1962).
- 739 49. Zheng, J. Energy metabolism of cancer: Glycolysis versus oxidative phosphorylation (Review).  
740 *Oncol Lett* **4**, 1151-1157 (2012).
- 741 50. Pfeiffer, T., Schuster, S. & Bonhoeffer, S. Cooperation and competition in the evolution of  
742 ATP-producing pathways. *Science* **292**, 504-507 (2001).
- 743 51. Lai, J.C. & Behar, K.L. Glycolysis-citric acid cycle interrelation: a new approach and some  
744 insights in cellular and subcellular compartmentation. *Dev Neurosci* **15**, 181-193 (1993).
- 745 52. Du, J., *et al.* Phototransduction Influences Metabolic Flux and Nucleotide Metabolism in  
746 Mouse Retina. *J Biol Chem* **291**, 4698-4710 (2016).
- 747 53. Gebhard, R. Cytochemical demonstration of aspartate aminotransferase activity in the rat  
748 retina. *Brain Res* **539**, 337-341 (1991).
- 749 54. Moffett, J.R., Ross, B., Arun, P., Madhavarao, C.N. & Namboodiri, A.M.A. N-Acetylaspartate in  
750 the CNS: from neurodiagnostics to neurobiology. *Progress in neurobiology* **81**, 89-131 (2007).
- 751 55. Dadsetan, S., *et al.* Brain alanine formation as an ammonia-scavenging pathway during  
752 hyperammonemia: effects of glutamine synthetase inhibition in rats and astrocyte-neuron  
753 co-cultures. *J Cereb Blood Flow Metab* **33**, 1235-1241 (2013).
- 754 56. Naser, R.K.A., Hassan, A.A.K., Shabana, A.M. & Omar, N.N. Role of magnetic resonance  
755 spectroscopy in grading of primary brain tumors. *The Egyptian Journal of Radiology and*  
756 *Nuclear Medicine* **47**, 577-584 (2016).
- 757 57. Igarashi, H., Suzuki, Y., Huber, V.J., Ida, M. & Nakada, T. N-acetylaspartate decrease in acute  
758 stage of ischemic stroke: a perspective from experimental and clinical studies. *Magn Reson*  
759 *Med Sci* **14**, 13-24 (2015).
- 760 58. Moffett, J., Arun, P., Ariyannur, P. & Namboodiri, A. N-Acetylaspartate reductions in brain  
761 injury: impact on post-injury neuroenergetics, lipid synthesis, and protein acetylation.  
762 *Frontiers in Neuroenergetics* **5**(2013).
- 763 59. Yan, H.D., Ishihara, K., Serikawa, T. & Sasa, M. Activation by N-acetyl-L-aspartate of acutely  
764 dissociated hippocampal neurons in rats via metabotropic glutamate receptors. *Epilepsia* **44**,  
765 1153-1159 (2003).
- 766 60. Alba-Arbalat, S., *et al.* In Vivo Molecular Changes in the Retina of Patients With Multiple  
767 Sclerosis. *Investigative ophthalmology & visual science* **62**, 11-11 (2021).
- 768 61. Sanyal, S. & Bal, A.K. Comparative light and electron microscopic study of retinal histogenesis  
769 in normal and rd mutant mice. *Z. Anat. Entwicklungsgesch* **142**, 219-238 (1973).
- 770 62. Caffè, A.R., *et al.* Mouse retina explants after long-term culture in serum free medium.  
771 *Journal of chemical neuroanatomy* **22**, 263-273 (2001).
- 772 63. Pang, Z., *et al.* MetaboAnalyst 5.0: narrowing the gap between raw spectra and functional  
773 insights. *Nucleic acids research* (2021).

774
